# Supplementary material
Source: ML conference proceedings conference paper supplement (https://proceedings.neurips.cc/paper_files/paper/2023/hash/6e73c39cc428c7d264d9820319f31e79-Abstract.html)
Supplement: Supplementary file 1 [file 6e73c39cc428c7d264d9820319f31e79-Supplemental-Conference.pdf]

|    |                                                                     |           |
|----|---------------------------------------------------------------------|-----------|
| 1  | <b>Contents</b>                                                     |           |
| 2  | <b>A Corrections to the main paper</b>                              | <b>2</b>  |
| 3  | <b>B Problem setup</b>                                              | <b>3</b>  |
| 4  | B.1 Notation . . . . .                                              | 3         |
| 5  | B.2 Data model . . . . .                                            | 4         |
| 6  | B.3 Network architecture, optimization and initialization . . . . . | 4         |
| 7  | B.4 Properties of the data and network at initialization . . . . .  | 5         |
| 8  | <b>C Supporting Lemmas</b>                                          | <b>10</b> |
| 9  | C.1 Bounds on activations and preactivations . . . . .              | 10        |
| 10 | C.2 Useful convergence lemmas . . . . .                             | 13        |
| 11 | <b>D Benign overfitting</b>                                         | <b>15</b> |
| 12 | D.1 Proof of Lemma 3.2 . . . . .                                    | 15        |
| 13 | D.2 Early training and proof of Lemma 3.3 . . . . .                 | 16        |
| 14 | D.3 Proof of Lemma 3.4 . . . . .                                    | 18        |
| 15 | D.4 Late training . . . . .                                         | 22        |
| 16 | D.5 Proof of Lemma 3.5 . . . . .                                    | 26        |
| 17 | D.6 Proof of Theorem 3.1 . . . . .                                  | 27        |
| 18 | <b>E Non-benign overfitting</b>                                     | <b>27</b> |
| 19 | E.1 Proof of Lemma 3.7 . . . . .                                    | 28        |
| 20 | E.2 Additional lemmas . . . . .                                     | 28        |
| 21 | E.3 Proof of Theorem 3.6 . . . . .                                  | 31        |
| 22 | <b>F Non-overfitting</b>                                            | <b>31</b> |
| 23 | F.1 Proof of Lemma 3.9 . . . . .                                    | 32        |
| 24 | F.2 Proof of Lemma 3.10 . . . . .                                   | 33        |
| 25 | F.3 Proof of Lemma 3.11 . . . . .                                   | 34        |
| 26 | F.4 Late training . . . . .                                         | 36        |
| 27 | F.5 Proof of Theorem 3.8 . . . . .                                  | 38        |
| 28 | <b>G Numerical simulations</b>                                      | <b>39</b> |

## 29 A Corrections to the main paper

30 In the course of preparing the supplementary materials we identified the following two mistakes.

31 1. First we found a mistake in one of the proofs for a lemma describing the conditions at  
 32 initialization. We have fixed this issue in the supplementary and highlight below the two  
 33 errors this has caused in the main paper.

34 • An entry in the Table 1 needs to be updated to reflect these changes: in particular the  
 35 dependence on  $n$  is  $\frac{1}{\delta}$  not  $n \geq 1$  for Theorem 3.1. Aside from this one entry Table 1 is  
 correct. For the convenience of the reader we provide the full, corrected table below.

Table 1: Comparison of results up to constants, note in all cases  $d \geq Cn^2 \log(n/\delta)$ ,  $k \leq \frac{n}{C}$  where  $C$  is an appropriately chosen constant.

|                                 | Frei et al. (2022)                  | Xu & Gu (2023)                               | Theorem 3.1                                 | Theorem 3.6                         | Theorem 3.8                         |
|---------------------------------|-------------------------------------|----------------------------------------------|---------------------------------------------|-------------------------------------|-------------------------------------|
| $n \geq C \cdot$                | $\log\left(\frac{1}{\delta}\right)$ | $\log\left(\frac{m}{\delta}\right)$          | $\frac{1}{\delta}$                          | 1                                   | $\log\left(\frac{m}{\delta}\right)$ |
| $m \geq C \cdot$                | 1                                   | $\log\left(\frac{n}{\delta}\right)$          | $\log\left(\frac{n}{\delta}\right)$         | $\log\left(\frac{n}{\delta}\right)$ | $\log\left(\frac{n}{\delta}\right)$ |
| $\gamma \leq \frac{1}{C} \cdot$ | $\frac{1}{n}$                       | $\frac{1}{n}$                                | $\frac{1}{n}$                               | $\frac{1}{\sqrt{nd}}$               | $\frac{1}{k}$                       |
| $\gamma \geq C \cdot$           | $\frac{1}{\sqrt{nd}}$               | $\sqrt{\frac{\log(\frac{md}{n\delta})}{nd}}$ | $\sqrt{\frac{\log(\frac{n^2}{\delta})}{d}}$ | 0                                   | $\frac{1}{n}$                       |
| Result                          | Benign <sup>1</sup>                 | Benign                                       | Benign                                      | Non-benign                          | No overfit                          |

36 • The same mistake also means that the sentence starting on line 188 “Comparing  
 37 specifically the results on benign overfitting, we observe a better dependency on  $n$  in  
 38 particular compared with Xu & Gu (2023)...” is incorrect and indeed their work has  
 39 better dependence on  $n$ .  
 40

41 2. On line 262 we made a mistake in the explanation of our results: instead of  $C\epsilon(1 + n\gamma)$  it  
 42 should read  $\frac{C\epsilon n\gamma}{(\eta(\gamma+\rho))}$ .

## 43 B Problem setup

### 44 B.1 Notation

45 In order to provide a convenient reference for the reader, we summarize our notation as follows.

- 46 • For  $n \in \mathbb{Z}_{\geq 1}$  then  $[n] := \{1, 2, 3 \dots n\}$ . Furthermore we let  $[n]_e := \{i \in [n] : i \text{ is even}\}$   
 47 and  $[n]_o := \{i \in [n] : i \text{ is odd}\}$ .
- 48 • For two iterations  $t_0, t_1$  with  $t_1 > t_0$  we define the following counting functions.
  - 49 1.  $T_{ij}(t_0, t_1) := \sum_{\tau=t_0}^{t_1-1} \mathbb{1}(i \in \mathcal{A}_j^{(\tau)} \cap \mathcal{F}^{(\tau)})$  is the number of times the  $i$ -th data point  
 50 updates the  $j$ -th neuron between iterations  $t_0$  and  $t_1$ .
  - 51 2.  $T_i(t_0, t_1) := \sum_{j \in [2m]} T_{ij}(t_0, t_1)$  is the total number of updates from the  $i$ -th data  
 52 point to the entire network between iterations  $t_0$  and  $t_1$ .
  - 53 3.  $G_j(t_0, t_1) := \sum_{i \in \mathcal{S}_T} T_{ij}(t_0, t_1)$  and  $B_j(t_0, t_1) := \sum_{i \in \mathcal{S}_F} T_{ij}(t_0, t_1)$  are the number  
 54 of clean and corrupt updates applied to the  $j$ -th neuron respectively between iterations  
 55  $t_0$  and  $t_1$ . We further define  $G_j^{(i)}(t_0, t_1) := G_j(t_0, t_1) - \mathbb{1}(i \in \mathcal{S}_T)T_{ij}(t_0, t_1)$  and  
 56  $B_j^{(i)}(t_0, t_1) := B_j(t_0, t_1) - \mathbb{1}(i \in \mathcal{S}_F)T_{ij}(t_0, t_1)$ .
  - 57 4.  $H_j^{(i)}(t_0, t_1) := \sum_{\ell \neq i} T_{\ell j}(t_0, t_1)$  is the number of times any data point except the  $i$ -th  
 58 updates the  $j$ -th neuron between iterations  $t_0$  and  $t_1$ .
  - 59 5.  $G(t_0, t_1) := \sum_{j \in [2m]} G_j(t_0, t_1)$  and  $B(t_0, t_1) := \sum_{j \in [2m]} B_j(t_0, t_1)$  are the total  
 60 number of clean and corrupt updates applied to the entire network between iterations  
 61  $t_0$  and  $t_1$ . We similarly define  $G^{(i)}(t_0, t_1) = G(t_0, t_1) - \mathbb{1}(i \in \mathcal{S}_T)T_i(t_0, t_1)$  and  
 62  $B^{(i)}(t_0, t_1) = B(t_0, t_1) - \mathbb{1}(i \in \mathcal{S}_F)T_i(t_0, t_1)$
  - 63 6.  $T(t_0, t_1) := \sum_{\ell} T_{\ell}(t_0, t_1)$  is the total number of updates from all points applied  
 64 to the entire network between iterations  $t_0$  and  $t_1$ . We also define  $T^{(i)}(t_0, t_1) =$   
 65  $T(t_0, t_1) - T_i(t_0, t_1)$ , the number of updates excluding those from point  $i$ .
  - 66 7.  $S_i(t_0, t_1) := \sum_{\tau=t_0}^{t_1-1} \mathbb{1}(\exists j \in [2m] : i \in \mathcal{A}_j^{(\tau)} \cap \mathcal{F}^{(\tau)})$  is the number of iterations  
 67 between  $t_0$  and  $t_1$  in which the  $i$ th data point participates. We say a data point  
 68 participates during an iteration if it contributes to the update of at least one neuron at  
 69 said iteration.
- 70 • We extend each of these definitions to the case  $t_0 = t_1$  by letting the empty sum be zero.
- 71 • The signal alignment of the  $j$ -th neuron is defined as  $C_j^{(t)} = \langle \mathbf{w}_j^{(t)}, (-1)^j \mathbf{v} \rangle$ .
- 72 • We use the notation  $O(\eta)$  to denote a quantity  $f(\eta)$  such that

$$\limsup_{\eta \rightarrow 0} \frac{|f(\eta)|}{\eta} < \infty.$$

73 Likewise,  $f(\eta) = O(1)$  if

$$\limsup_{\eta \rightarrow 0} |f(\eta)| < \infty,$$

74  $f(\eta) = \Omega(\eta)$  if

$$\liminf_{\eta \rightarrow 0} \frac{|f(\eta)|}{\eta} > 0,$$

75 and  $f(\eta) = \Omega(1)$  if

$$\liminf_{\eta \rightarrow 0} |f(\eta)| > 0.$$

76 Here the limit is taken as  $\eta$  and  $\lambda_w$  go to zero while the other parameters of the model and  
 77 data remain fixed. We will always choose  $\lambda_w$  such that  $\lambda_w = O(\eta)$ .

- 78 • Denote  $\mathcal{T}_0$  be the first iteration  $t$  where  $\mathcal{F}^{(t)} \neq [2n]$ .
- 79 • We use  $C \geq 1$  and  $c \leq 1$  to generically represent sufficiently large and small constants  
 80 respectively. Furthermore, we reuse both  $C$  and  $c$  from one line to another: for example,  
 81  $2Cx = Cx$  and  $0.5cx = cx$ .

- Finally, in much of our analysis for particular variables, notably  $\gamma$ , the constants involved matter and as such we work with explicit constants. For other variables, in particular  $m$  and  $n$ , then typically as long as they are sufficiently large the explicit constants involved are not important. As such we typically resort to using a generically large enough constant  $C$ .

## B.2 Data model

For the reader's convenience we recap the data model studied in this work. We consider a training sample of  $2n$  pairs of points and their labels  $(\mathbf{x}_i, y_i)_{i=1}^{2n}$  where  $(\mathbf{x}_i, y_i) \in \mathbb{R}^d \times \{-1, +1\}$ . Furthermore, we identify two disjoint subsets  $\mathcal{S}_T \subset [2n]$  and  $\mathcal{S}_F \subset [2n]$ , where  $\mathcal{S}_T \cup \mathcal{S}_F = [2n]$ , which correspond to the clean and corrupt points in our sample respectively. The categorization of a point as clean or corrupted is determined by its label: for all  $i \in [2n]$  we assume  $y_i = \beta(i)(-1)^i$  where  $\beta(i) = -1$  iff  $i \in \mathcal{S}_F$  and  $\beta(i) = 1$  otherwise. In addition, we assume  $|\mathcal{S}_F \cap [2n]_e| = |\mathcal{S}_F \cap [2n]_o| = k$  and  $|\mathcal{S}_T \cap [2n]_e| = |\mathcal{S}_T \cap [2n]_o| = n - k$ . We remark that this assumption simplifies the exposition of our results but is not actually integral to our analysis. Each data point is assumed to have the form

$$\mathbf{x}_i = (-1)^i(\sqrt{\gamma}\mathbf{v} + \sqrt{1-\gamma}\beta(i)\mathbf{n}_i). \quad (1)$$

Here  $\mathbf{v} \in \mathbb{R}^d$  satisfies  $\|\mathbf{v}\| = 1$ . We refer to  $\mathbf{v}$  as the signal component as the alignment of a clean point with  $\mathbf{v}$  determines its sign. Indeed,  $\text{sign}(\langle \mathbf{x}_i, \mathbf{v} \rangle) = (-1)^i = y_i$  for  $i \in \mathcal{S}_T$  whereas  $\text{sign}(\langle \mathbf{x}_i, \mathbf{v} \rangle) = -y_i$  for  $i \in \mathcal{S}_F$ . Thus we may view the labels of corrupt point as flipped from their clean state. The random vectors  $(\mathbf{n}_i)_{i=1}^{2n}$  are mutually independent and identically distributed (i.i.d.) drawn from the uniform distribution over  $\mathbb{S}^{d-1} \cap \text{span}\{\mathbf{v}\}^\perp$ , which we denote  $U(\mathbb{S}^{d-1} \cap \text{span}\{\mathbf{v}\}^\perp)$ . This distribution is symmetric, mean zero and for any  $\mathbf{n} \sim U(\mathbb{S}^{d-1} \cap \text{span}\{\mathbf{v}\}^\perp)$  it holds that  $\mathbf{n} \perp \mathbf{v}$  and  $\|\mathbf{n}\| = 1$ . We refer to these vectors as noise components due to the fact that they are independent of the labels of their respective points. We also remark that as the noise distribution is symmetric then clean and corrupt points are identically distributed. Indeed, the multiplication of the noise component by  $\beta(i)$  results in the following expression which will prove convenient.

$$y_i \mathbf{x}_i = \beta(i)\sqrt{\gamma}\mathbf{v} + \sqrt{1-\gamma}\mathbf{n}_i. \quad (2)$$

This expression entails that the only difference between clean and corrupt points during training is that they push neurons in opposite directions along the signal vector. Finally, the real, scalar quantity  $\gamma \in [0, 1]$  controls the strength of the signal versus noise, furthermore the clean margin, i.e., the distance from any clean point to the max margin classifier, is  $\sqrt{\gamma}$  by construction. Thus far we have discussed only the data in the training sample. We assume test data are drawn mutually i.i.d. from the same distribution as the points in the training sample but with the added proviso that they are always clean: to be clear, at test time a label is sampled as  $y \sim U(\{-1, 1\})$  and the corresponding data point has the form

$$\mathbf{x} = y(\sqrt{\gamma}\mathbf{v} + \sqrt{1-\gamma}\mathbf{n}), \quad (3)$$

where again  $\mathbf{n} \sim U(\mathbb{S}^{d-1} \cap \text{span}\{\mathbf{v}\}^\perp)$ .

## B.3 Network architecture, optimization and initialization

Here we also recap the network architecture and optimization and initialization setting. We consider a densely connected, single layer feedforward neural network  $f : \mathbb{R}^{2m \times d} \times \mathbb{R}^d \rightarrow \mathbb{R}^d$  with the following forward pass map,

$$f(\mathbf{W}, \mathbf{x}) = \sum_{j=1}^{2m} (-1)^j \phi(\langle \mathbf{w}_j, \mathbf{x} \rangle).$$

Here  $\phi := \max\{0, z\}$  denotes the ReLU activation function,  $\mathbf{w}_j$  the  $j$ th row of  $\mathbf{W}$  and  $w_{jc}$  the element of  $\mathbf{W}$  on row  $j \in [m]$  and column  $c \in [d]$ . We remark that only the weights of the hidden layer, which we also refer to as the weights of the network, are trainable and the outer weights remain frozen throughout training. The network weights are optimized using full batch gradient descent (GD) with step size  $\eta > 0$  to minimize the hinge loss over a training sample  $((\mathbf{x}_i, y_i))_{i=1}^{2n} \subset (\mathbb{R}^d \times \{-1, 1\})^{2n}$  as described in Section B.2. After  $t' > 0$  iterations this optimization process generates a sequence of weight matrices  $(\mathbf{W}^{(t)})_{t=0}^{t'}$ . For convenience we overload our

125 notation for the forward pass map of the network by letting  $f(t, \mathbf{x}) := f(\mathbf{W}^{(t)}, \mathbf{x})$ . We denote the  
 126 hinge loss on the  $i$ -th point at iteration  $t$  as

$$\ell(t, i) := \max\{0, 1 - y_i f(t, \mathbf{x}_i)\},$$

127 the hinge loss over the entire training sample at iteration  $t$  is therefore defined as

$$L(t) := \sum_{i=1}^{2n} \ell(t, i).$$

128 Let  $\mathcal{F}^{(t)} := \{i \in [2n] : \ell(t, \mathbf{x}_i) < 1\}$  be the set of points that have nonzero loss at iteration  $t$ , and  
 129  $\mathcal{A}_j^{(t)} := \{i \in [2n] : \langle \mathbf{w}_j^{(t)}, \mathbf{x}_i \rangle > 0\}$  the set of points which activate the  $j$ th neuron at iteration  $t$ .  
 130 Combining (2) with

$$\frac{\partial \ell(t, i)}{\partial w_{jr}} = \begin{cases} 0, & \langle \mathbf{w}_j^{(t)}, \mathbf{x}_i \rangle \leq 0, \\ -(-1)^j y_i x_{ir}, & \langle \mathbf{w}_j^{(t)}, \mathbf{x}_i \rangle > 0 \end{cases}$$

131 gives that the GD update rule<sup>2</sup> for the neuron weights for any iteration  $t \geq 0$ ,

$$\mathbf{w}_j^{(t+1)} = \mathbf{w}_j^{(t)} + (-1)^j \eta \sum_{\ell=1}^{2n} \mathbb{1}(\ell \in \mathcal{A}_j^{(t)} \cap \mathcal{F}^{(t)}) y_\ell \mathbf{x}_\ell. \quad (4)$$

132 In regard to the initialization of the network weights, for convenience we assume each neuron's  
 133 weight vector is drawn mutually i.i.d. uniform from the centered sphere with radius  $\lambda_w > 0$ . We  
 134 remark that results analogous to the ones presented trivially hold if the weights are instead initialized  
 135 mutually i.i.d. as  $w_{jc}^{(0)} \sim \mathcal{N}(0, \sigma_w^2)$  as long as  $\sigma_w^2$  is sufficiently small.

#### 136 B.4 Properties of the data and network at initialization

137 For each of our results to hold we require certain properties on both the network weights and training  
 138 sample to hold at initialization. Here we bound the probabilities of each of these events in isolation  
 139 and later will combine them using the union bound.

140 First, and in order to prove convergence, we require the noise components of the training sample to  
 141 be approximately orthogonal to one another. A training sample whose noise components satisfy this  
 142 approximate orthogonality condition we refer to as "good".

143 **Lemma B.1.** *Let  $\rho, \delta \in (0, 1)$ . Given a sequence  $(\mathbf{n}_i)_{i=1}^{2n}$  of mutually i.i.d. random vectors with*  
 144  *$\mathbf{n}_i \sim U(\mathbb{S}^{d-1} \cap \text{span}(\mathbf{v})^\perp)$ , then assuming  $d \geq \max\left\{6, 3\rho^{-2} \ln\left(\frac{2n^2}{\delta}\right)\right\}$*

$$\mathbb{P}\left(\bigcap_{i \neq \ell} \{|\langle \mathbf{n}_i, \mathbf{n}_\ell \rangle| \leq \rho\}\right) \geq 1 - \delta.$$

145 *Proof.* For any pairs of mutually i.i.d. random vectors  $\mathbf{n}, \mathbf{n}' \sim U(\mathbb{S}^{d-1} \cap \text{span}(\mathbf{v})^\perp)$  and  $\mathbf{u}, \mathbf{u}' \sim$   
 146  $U(\mathbb{S}^{d-2})$  observe

$$\langle \mathbf{n}, \mathbf{n}' \rangle \stackrel{d}{=} \langle \mathbf{u}, \mathbf{u}' \rangle.$$

147 Due to independence of  $\mathbf{u}, \mathbf{u}'$  and the rotational invariance of  $U(\mathbb{S}^{d-2})$

$$\langle \mathbf{u}, \mathbf{u}' \rangle \stackrel{d}{=} \langle \mathbf{u}, \mathbf{e}_1 \rangle,$$

148 where here  $\mathbf{e}_1 = [1, 0, \dots, 0]^T$ . Let  $\text{Cap}(\mathbf{e}_1, \rho) := \{\mathbf{z} \in \mathbb{S}^{d-2} : \langle \mathbf{e}_1, \mathbf{z} \rangle \geq \rho\}$  denote the *spherical cap*  
 149 of  $\mathbb{S}^{d-2}$  centered on  $\mathbf{e}_1$ . As  $d \geq 6$  then from Ball (1997)[Lemma 2.2] it follows that

$$\mathbb{P}(|\langle \mathbf{n}, \mathbf{n}' \rangle| \geq \rho) = \mathbb{P}(\mathbf{u} \in \text{Cap}(\mathbf{e}_1, \rho)) \leq \exp\left(-\frac{(d-2)\rho^2}{2}\right) \leq \exp\left(-\frac{d\rho^2}{3}\right).$$

---

<sup>2</sup>Although the derivative of ReLU clearly does not exist at zero, we follow the routine procedure of defining an update rule that extends the gradient update to cover this event.

150 Applying the union bound then

$$\begin{aligned}\mathbb{P}\left(\bigcap_{i,\ell \in [2n], i \neq \ell} \{|\langle \mathbf{n}_i, \mathbf{n}_\ell \rangle| \leq \rho\}\right) &= 1 - \mathbb{P}\left(\bigcup_{i,\ell \in [2n], i \neq \ell} \{|\langle \mathbf{n}_i, \mathbf{n}_\ell \rangle| \geq \rho\}\right) \\ &\geq 1 - 2n^2 \mathbb{P}(|\langle \mathbf{n}_i, \mathbf{n}_\ell \rangle| \geq \rho) \\ &\geq 1 - 2n^2 \exp\left(-\frac{d\rho^2}{3}\right).\end{aligned}$$

151 Setting  $\delta \geq 2n^2 \exp\left(-\frac{d\rho^2}{3}\right)$  and rearranging we arrive at the result claimed.  $\square$

152 In addition to requiring the approximate orthogonality property on the training data, our approach  
153 also requires at least a large proportion of the neurons at initialization to satisfy certain conditions.  
154 To this end, we introduce the following notation, where  $p \in \{-1, 1\}$ .

- 155 • Let  $\Gamma_p := \{j : (-1)^j = p, G_j(0, 1)(\gamma - \rho) - B_j(0, 1)(\gamma + \rho) \geq \frac{2\lambda_w}{\eta}\}$  denote the set  
156 of neurons with output weight  $(-1)^p$  which have more clean points activating them than  
157 corrupt ones at initialization. We will show that these sets of neurons have a *predictable*  
158 behavior early during training before any clean points achieve zero loss. Let  $\Gamma = \Gamma_1 \cup \Gamma_{-1}$ .
- 159 • Let  $\Theta_p := \{j \sim \Gamma_p : G_j(0, 1)(\gamma + \rho) - B_j(0, 1)(\gamma - \rho) < 1 - \gamma + \rho\} \subset \Gamma_p$ . We will  
160 show that neurons in this subset are able to *carry* corrupt points through training, eventually,  
161 at least in the overfitting setting, enabling them to achieve zero loss.. Let  $\Theta = \Theta_1 \cup \Theta_{-1}$ .

162 Our goals are two-fold: first show  $\Gamma_p$  accounts for a significant proportion of the neurons with output  
163 label sign matching  $p$ , second, and of particular importance for our result on benign overfitting, ensure  
164 each corrupt point activates a neuron in  $\Theta_p$  where  $p$  matches its label. To this end we first provide the  
165 following result.

166 **Lemma B.2.** Define  $\mu := \frac{2k}{n+k}$  and assume  $\kappa \in (0, 1)$  satisfies  $\kappa > \mu$ . Given an arbitrary neuron  
167  $\mathbf{w}_j \sim U(\mathbb{S}^{d-1})$ , we say that a collection of training points is  $(\varepsilon, \kappa)$ -good iff both  $T_j(0, 1) \geq 1$  and  
168  $B_j(0, 1) < \kappa T_j(0, 1)$  with probability at least  $1 - \varepsilon$  over the randomness of the neuron. Define

$$\delta := 2 \exp\left(-\frac{(n+k)(\kappa - \mu)^2}{16}\right),$$

169 then with probability at least  $1 - \frac{\delta}{\varepsilon}$  the training sample is  $(\varepsilon, \kappa)$ -good.

170 *Proof.* First we establish the notation for what follows: we say a point  $\mathbf{x}$  is positive iff  $\langle \mathbf{x}, \mathbf{v} \rangle > 0$   
171 and is negative iff  $\langle \mathbf{x}, \mathbf{v} \rangle < 0$ . We use  $\mathcal{S}^+$  and  $\mathcal{S}^-$  to denote these sets of points respectively. Note  
172 by construction, see (1), clean and corrupt points of the same sign are mutually i.i.d. As here we  
173 only ever consider the activations at initialization, we also drop both the subscript  $j$  as well as the  
174 argument parentheses on the counting functions. We also use  $\pm$  superscripts to denote the subsets  
175 corresponding to activations from positive and negative points respectively: as indicative examples of  
176 this notation,  $T$  is therefore used as shorthand for the total number of activations,  $B^+$  is the number  
177 corrupt positive activations and  $G^-$  is the number of clean negative activations.

178 By the symmetry of the distribution of  $\mathbf{w}$ ,  $\mathbb{P}(\langle \mathbf{w}, \mathbf{v} \rangle > 0) = \mathbb{P}(\langle \mathbf{w}, \mathbf{v} \rangle < 0) = \frac{1}{2}$ . As a result

$$\begin{aligned}\mathbb{P}((B < \kappa T) \cap (T > 0)) &= \frac{1}{2} \mathbb{P}((B < \kappa T) \cap (T > 0) \mid \langle \mathbf{w}, \mathbf{v} \rangle > 0) \\ &\quad + \frac{1}{2} \mathbb{P}((B < \kappa T) \cap (T > 0) \mid \langle \mathbf{w}, \mathbf{v} \rangle < 0).\end{aligned}$$

179 As the analysis and results derived under either condition will prove identical under reversal of the  
180 signs involved, without loss of generality we let  $\langle \mathbf{w}, \mathbf{v} \rangle > 0$ . Using the union bound

$$\mathbb{P}((B < \kappa T) \cap (T > 0) \mid \langle \mathbf{w}, \mathbf{v} \rangle > 0) \geq 1 - \mathbb{P}(T = 0 \mid \langle \mathbf{w}, \mathbf{v} \rangle > 0) - \mathbb{P}(B \geq \kappa T \mid \langle \mathbf{w}, \mathbf{v} \rangle > 0),$$

181 therefore it suffices to upper bound the two probabilities on the right-hand-side.

182 Observe if  $\langle \mathbf{w}, \mathbf{v} \rangle > 0$  then for  $\mathbf{x} \in \mathcal{S}^+$   $\mathbb{P}(\langle \mathbf{x}, \mathbf{w} \rangle) > 1/2$  and for  $\mathbf{x} \in \mathcal{S}^-$   $\mathbb{P}(\langle \mathbf{x}, \mathbf{w} \rangle) < 1/2$ . By  
 183 the mutual independence of the preactivations  $(\langle \mathbf{x}, \mathbf{w}_j \rangle)_{i=1}^{2n}$  then  $\mathbb{P}(T = 0 \mid \langle \mathbf{w}, \mathbf{v} \rangle > 0) \leq (1/2)^n$ .  
 184 To upper bound the other probability of interest we further condition on the following two events:  
 185 there are no negative clean activations and all corrupt points are positive. Conditioning on these  
 186 three events, which we denote for convenience  $\Lambda$ , then  $T^+ = T$  and furthermore the event  $B < \kappa T$   
 187 is equivalent to  $B^+ < \kappa T^+$ . Again as the preactivations are mutually independent the number  
 188 of positive activations can be lower bounded using a binomial distribution with probability  $1/2$ .  
 189 Applying a Chernoff bound

$$\mathbb{P}\left(T^+ \geq \frac{n+k}{4} \mid \Lambda\right) \geq 1 - \exp\left(-\frac{n+k}{16}\right).$$

190 Furthermore, sampling positive points which activate  $\mathbf{w}_j$  is equivalent to uniformly sampling without  
 191 replacement  $T^+$  points from  $\mathcal{S}^+$ . Let  $Z_\ell = 1$  iff the  $\ell$ -th element sampled from  $\mathcal{S}^+$  is corrupt and is  
 192 0 otherwise. Using a variant of Hoeffding's bound for sampling without replacement (see Proposition  
 193 1.2 of Bardenet & Maillard (2015) for example)

$$\mathbb{P}(B^+ \geq \kappa T^+ \mid \Lambda) = \mathbb{P}\left(\frac{1}{T^+} \sum_{\ell=1}^{T^+} Z_\ell - \mu \geq \kappa - \mu\right) \leq \exp(-2T^+(\kappa - \mu)^2).$$

194 Therefore

$$\begin{aligned} & \mathbb{P}((B < \kappa T) \cap (T > 0) \mid \langle \mathbf{w}, \mathbf{v} \rangle > 0) \\ & \geq 1 - \mathbb{P}(T = 0 \mid \langle \mathbf{w}, \mathbf{v} \rangle > 0) - \mathbb{P}(B \geq \kappa T \mid \langle \mathbf{w}, \mathbf{v} \rangle > 0) \\ & \geq 1 - (1/2)^n - \mathbb{P}\left(B^+ \geq \kappa T^+ \mid T^+ \geq \frac{n+k}{4}, \Lambda\right) \mathbb{P}\left(T^+ \geq \frac{n+k}{4} \mid \Lambda\right) \\ & \geq 1 - (1/2)^n - \exp\left(-\frac{(n+k)(\kappa - \mu)^2}{16}\right) \\ & \geq 1 - \delta. \end{aligned}$$

195 Now if instead  $\langle \mathbf{x}, \mathbf{w} \rangle < 0$  then swapping the roles of the negative and positive points in the argument  
 196 above gives the same answer. As a result

$$\mathbb{P}((B < \kappa T) \cap (T > 0)) \geq 1 - \delta.$$

197 For convenience let  $X := (\mathbf{x}_i)_{i=1}^{2n}$  and

$$\chi_{\kappa, \epsilon}^c = \{X : \mathbb{P}_w((B \geq \kappa T) \cup (T = 0)) > \epsilon\}.$$

198 Note here that the subscript  $w$  indicates randomness over the neuron alone and in addition clearly by  
 199 construction

$$\mathbb{P}((B \geq \kappa T) \cup (T = 0) \mid X \in \chi_{\kappa, \epsilon}^c) > \epsilon.$$

200 Furthermore, as

$$\delta \geq \mathbb{P}((B \geq \kappa T) \cup (T = 0)) \geq \mathbb{P}((B \geq \kappa T) \cup (T = 0) \mid X \in \chi_{\kappa, \epsilon}^c) \mathbb{P}(X \in \chi_{\kappa, \epsilon}^c),$$

201 then it follows that  $\mathbb{P}(X \in \chi_{\kappa, \epsilon}^c) \leq \frac{\delta}{\epsilon}$ . As a result we conclude that the probability of drawing a  
 202  $(\kappa, \epsilon)$ -good training sample is at least  $1 - \frac{\delta}{\epsilon}$ .  $\square$

203 Based on Lemma B.2, the following lemma bounds the probability that  $\Gamma_p$  is sufficiently large for our  
 204 purposes. In particular, for our result on non-overfitting we require  $|\Gamma_p| = m$ , while for our benign  
 205 overfitting result only that  $|\Gamma_p| \geq (1 - \alpha)m$  for some constant  $\alpha \in (0, 1)$ .

206 **Lemma B.3.** Suppose  $n \geq 15k$ ,  $2\lambda_w \leq \eta(\gamma - \rho)$ ,  $\gamma \geq 2\rho$  and  $p \in \{-1, 1\}$ . Then for sufficiently  
 207 large  $n$  there exists a constant  $c > 0$  such that the following are true.

208 1.  $\mathbb{P}(|\Gamma_p| = m) = 1 - m \exp(-cn)$ .

209 2. With  $\alpha \in (0, 1)$  a constant such that  $\alpha m \in [m]$ , then

$$\mathbb{P}(|\Gamma_p| \geq (1 - \alpha)m) \geq 1 - \exp(-cn).$$

210 *Proof.* As here we only ever consider the activations at initialization, for convenience we drop the  
 211 argument parentheses “(0, 1)” on the counting functions: in particular we write  $T_j(0, 1)$  as  $T_j$  and  
 212  $B_j(0, 1)$  as  $B_j$ . Suppose  $(j)^{-1} = p$ , under the assumption  $\lambda_w \leq \eta(\gamma - \rho)$  then if

$$G_j(\gamma - \rho) - B_j(\gamma + \rho) > (\gamma - \rho) \geq \frac{2\lambda_w}{\eta}$$

213 we may conclude  $j \in \Gamma_p$ . Rearranging this expression, equivalently  $j \in \Gamma_p$  if

$$(1 + B_j)\gamma < (\gamma - \rho)T_j.$$

214 As a result, membership to  $\Gamma_p$  is guaranteed as long as  $T_j > 0$  and  $B_j < \frac{\gamma - \rho}{2\gamma}T_j$ . Note by the  
 215 assumptions of the lemma  $\mu := \frac{2k}{n+k} \leq \frac{1}{8}$  and  $\frac{\gamma - \rho}{2\gamma} \geq \frac{1}{4}$ . Conditioning on the event we draw a  $(\epsilon, \frac{1}{4})$ -  
 216 good training sample then the probability that  $j \notin \Gamma_p$  is at most  $\epsilon$  by Lemma B.2. Furthermore, with  
 217 the training sample fixed the activations of each neuron are mutually independent. Let  $X = (\mathbf{x}_i)_{i=1}^n$   
 218 denote the draw of the training sample and

$$\chi_{\kappa, \epsilon} = \{X : \mathbb{P}_w((B \geq \kappa T) \cup (T = 0)) \leq \epsilon\}$$

219 the set of  $(\epsilon, \frac{1}{4})$ -good training samples. Let  $\epsilon = \exp(-cn)$ , where  $c$  in what follows is a sufficiently  
 220 small constant. By the assumptions of the lemma

$$\mathbb{P}(X \in X_{1/4, \epsilon}) \geq 1 - \frac{\delta}{\epsilon} \geq 1 - 2 \exp\left(-\frac{n}{1024} + cn\right) \geq 1 - 2 \exp(-cn).$$

221 For the first result, using the union bound

$$\begin{aligned} \mathbb{P}(|\Gamma_p| = m) &\geq \mathbb{P}(|\Gamma_p| = m \mid X \in X_{1/4, \epsilon}) \mathbb{P}(X \in X_{1/4, \epsilon}) \\ &\geq (1 - m \exp(-cn)) (1 - 2 \exp(-cn)) \\ &\geq 1 - m \exp(-cn) \end{aligned}$$

222 as claimed. For the second result observe

$$\begin{aligned} \mathbb{P}(|\Gamma_p| < (1 - \alpha)m \mid X \in X_{1/4, \epsilon}) &= \mathbb{P}(\exists \mathcal{J} \subset [2m]_p, |\mathcal{J}| = \alpha m : j \notin \Gamma_p \forall j \in \mathcal{J} \mid X \in X_{\kappa, \epsilon}) \\ &\leq \binom{m}{\alpha m} \epsilon^{\alpha m} \\ &\leq \left(\frac{\epsilon e}{\alpha}\right)^{\alpha m}. \end{aligned}$$

223 As  $\alpha$  is a constant again there is a sufficiently small constant  $c$  such that

$$\frac{\epsilon e}{\alpha} = \exp(-cn + 1 + \log(1/\alpha)) \leq \exp(-cn).$$

224 Therefore, there exists a sufficiently small constant  $c$  such that

$$\begin{aligned} \mathbb{P}(|\Gamma_p| \geq (1 - \alpha)m) &\geq \mathbb{P}(|\Gamma_p| \geq (1 - \alpha)m \mid X \in X_{1/4, \epsilon}) \mathbb{P}(X \in X_{1/4, \epsilon}) \\ &\geq (1 - \exp(-cmn\alpha)) (1 - 2 \exp(-cn)) \\ &\geq 1 - \exp(-cn) \end{aligned}$$

225 as claimed. □

226 **Lemma B.4.** Assume  $\gamma + \rho \leq \frac{1}{1.02(n-k)}$ ,  $n - k \geq 2 \times 10^6$ ,  $|\Gamma_p| > 0.99m$  for  $p \in \{-1, 1\}$  and  
 227  $m \geq C \log(n)$  for a sufficiently large constant  $C$ . Then with probability at least  $1 - \frac{C}{n}$  for all  $i \in \mathcal{S}_F$   
 228 there exists a  $j \in \Theta_{y_i}$  such that  $i \in \mathcal{A}_j^{(0)}$ .

229 *Proof.* For convenience in what follows we use  $G_j$  and  $B_j$  for  $G_j(0, 1)$  and  $B_j(0, 1)$  respectively.  
 230 For a neuron to be in  $\Theta_p$  it must satisfy the following condition,

$$G_j(\gamma + \rho) - B_j(\gamma - \rho) < 1 - \gamma + \rho,$$

231 or alternatively

$$G_j < \frac{1 - \gamma + \rho}{\gamma + \rho} = \frac{1}{\gamma + \rho} - \frac{\gamma - \rho}{\gamma + \rho}.$$

232 By our assumptions this is in turn implied by the following condition  $G_j < 1.02(n - k) - 1$  or  
 233  $G_j < 1.01(n - k)$  for  $n - k > 100$ .

234 Let  $P(i, l)$  be the probability that an arbitrary random neuron is active on points  $i$  and  $l$ . Consider  
 235 independently drawing two points from the distribution over points with either positive or negative  
 236 signal sign component, and let  $p$  be the probability that an arbitrary random neuron is active on both  
 237 points. Similarly let  $q$  be the probability that an arbitrary neuron is active on two points which are  
 238 drawn with opposite signal signs. By rotational invariance of the weight distribution the probability a  
 239 random neuron activates on a point is  $1/2$ , therefore  $\mathbb{E}(G_j) = n - k$  and furthermore  $P(i, i) = 1/2$ .  
 240 In addition, by writing  $G_j$  as a sum of indicator functions, expanding, and using the linearity of  
 241 expectation we have

$$\mathbb{E}(G_j^2) = \sum_{(i,l) \in [n-k] \times [n-k]} P(i, l) = \frac{1}{2}2(n - k) + 2(n - k)^2q + 2(n - k)(n - k - 1)p.$$

242 Recall  $i$  and  $l$  index over the clean points. Observe by construction that for  $i \not\sim l$  then  $-\mathbf{x}_l \stackrel{d}{=} \mathbf{x}_i$ . As  
 243 a result, using an abuse of notation where the index  $-j$  indicates the point  $-\mathbf{x}_j$ , then for  $i \sim l \not\sim j$   
 244 we have  $P(i, j) = P(i, -l)$ . If a neuron activates on  $\mathbf{x}_l$  iff it does not activate on  $-\mathbf{x}_l$ , therefore  
 245  $P(i, l) + P(i, -l) = P(i, i) = 1/2$  and hence we conclude  $p + q = 1/2$ . As a result

$$\begin{aligned} \mathbb{E}(G_j^2) &= (n - k) + 2(n - k)((n - k)q + (n - k)p - p) \\ &= (n - k) + 2(n - k)\left(\frac{1}{2}(n - k) - p\right) \\ &\leq (n - k) + (n - k)^2. \end{aligned}$$

246 As  $\mathbb{E}(G_j) = n - k$ , it follows that  $G_j$  has variance  $n - k$ . Therefore by Chebyshev's inequality

$$\mathbb{P}(G_j \geq 1.01(n - k)) \leq \frac{10^4}{n - k}.$$

247 Therefore a given random neuron  $j$  satisfies the condition  $G_j < 1.01(n - k)$  with failure probability  
 248 at most  $\frac{10^4}{n - k}$ . Applying Markov's inequality

$$\mathbb{P}\left(\sum_{j=1}^{2m} \mathbb{1}(G_j \geq 1.01(n - k)) \geq \frac{2m}{100}\right) \leq \frac{10^6}{2(n - k)}$$

249 and therefore

$$\mathbb{P}\left(\sum_{j=1}^{2m} \mathbb{1}(G_j < 1.01(n - k)) \geq 1.998m\right) \geq 1 - \frac{10^6}{2(n - k)}.$$

250 Now by a Chernoff bound, there exists a small constant  $c > 0$  such that with probability at least  
 251  $1 - \exp(-cm)$ , a fixed training point is activated by at least  $1/3$  of the neurons of each sign. Therefore,  
 252 using the union bound every training point is activated by at least  $m/3$  of the neurons with probability  
 253 at least  $1 - n \exp(-cm) \geq 1 - \exp(-cm)$  using that  $\log n \leq O(m)$ .

254 Let  $\Lambda := \{j \in [2m] : G_j < 1.01(n - k)\}$  and observe that if  $j \in \Gamma_p$  and  $j \in \Lambda$  then  $j \in \Theta_p$ .  
 255 Condition on two further events in addition to  $|\Gamma_p| \geq 0.99m$  for  $p \in \{-1, 1\}$ :  $|\Lambda| \geq 1.998m$  and for  
 256 all  $i \in \mathcal{S}_F$  then  $|\mathcal{I}_i(0) \cap \{j : (-1)^j = y_i\}| \geq m/3$  and for any  $p \in \{-1, 1\}$ . Then with probability  
 257 one we have for all  $i \in \mathcal{S}_F$  that there exists a  $j \in \Theta_{y_i}$  such that  $i \in \mathcal{A}_j^{(0)}$ . The probability that these  
 258 two conditions hold is at least

$$1 - \frac{C}{n} - \exp(-cm).$$

259 Supposing that  $m \geq C \log(n)$  for a sufficiently large constant  $C$  then this probability can in turn be  
 260 lower bounded as

$$1 - \frac{C}{n}$$

261 as claimed.

262

□

263 The final lemma we provide here states, under mild conditions on the network width, that with high  
 264 probability every point in the training sample activates a neuron whose output weight matches its  
 265 label in sign. We will use this to prove our result on non-benign overfitting, which is discussed in  
 266 Section E.

267 **Lemma B.5.** *Let  $\delta \in (0, 1)$ , then if  $m \geq \log_2(\frac{2n}{\delta})$  the probability that for all  $i \in [2n]$  there exists a  
 268  $j \in [2m]$  such that  $(-1)^j = y_i$  and  $i \in \mathcal{A}_j^{(0)}$  is at least  $1 - \delta$ .*

269 *Proof.* Observe by the rotational symmetry of the weight distribution that

$$\mathbb{P}(\langle \mathbf{w}_j, \mathbf{x}_i \rangle > 0) = \mathbb{P}(\langle \mathbf{w}_j, \mathbf{e}_1 \rangle > 0) = 1/2.$$

270 By construction, for each element in the training sample  $(\mathbf{x}_i, y_i)$  there are  $m$  neurons whose output  
 271 weight has the same sign as  $y_i$ . As the preactivations of  $\mathbf{x}_i$  with each neuron are mutually independent  
 272 from one another, then using the union bound it follows that

$$\begin{aligned} \mathbb{P}\left(\bigcap_{i=1}^{2n} \{\exists j \in [2m] : (-1)^j = y_i, i \in \mathcal{A}_j^{(0)}\}\right) &= 1 - \mathbb{P}\left(\bigcup_{i=1}^{2n} \{\nexists j \in [2m] : (-1)^j = y_i, i \in \mathcal{A}_j^{(0)}\}\right) \\ &\geq 1 - 2n\mathbb{P}(\langle \mathbf{w}_j, \mathbf{x}_i \rangle > 0) \\ &= 1 - 2n2^{-m}. \end{aligned}$$

273 Setting  $\delta \geq 2n2^{-m}$  and rearranging we arrive at the stated result.  $\square$

## 274 C Supporting Lemmas

### 275 C.1 Bounds on activations and preactivations

276 For any pair of iterations  $t, t_0$  satisfying  $t > t_0$ , unrolling the GD update rule (4) gives

$$\mathbf{w}_j^{(t_1)} = \mathbf{w}_j^{(t_0)} + (-1)^j \eta \sum_{\ell=1}^{2n} T_{\ell j}(t_0, t) y_\ell \mathbf{x}_\ell.$$

277 Using (1) and the fact that  $\mathbf{n}_i \perp \mathbf{v}$ , then for any  $i \in [2n]$

$$\begin{aligned} \langle \mathbf{w}_j^{(t)}, \mathbf{x}_i \rangle &= \langle \mathbf{w}_j^{(t_0)}, \mathbf{x}_i \rangle + (-1)^j \eta \sum_{\ell=1}^{2n} T_{\ell j}(t_0, t) y_\ell \langle \mathbf{x}_\ell, \mathbf{x}_i \rangle \\ &= \langle \mathbf{w}_j^{(t_0)}, \mathbf{x}_i \rangle + (-1)^{j+i} \eta \sum_{\ell=1}^{2n} T_{\ell j}(t_0, t) (-1)^{\ell+i} \beta(\ell) \langle \mathbf{x}_\ell, \mathbf{x}_i \rangle \\ &= \langle \mathbf{w}_j^{(t_0)}, \mathbf{x}_i \rangle + (-1)^{j+i} \beta(i) \eta \sum_{\ell=1}^{2n} T_{\ell j}(t_0, t) \lambda_{i\ell}, \end{aligned} \tag{5}$$

278 where we define  $\lambda_{i\ell} := (-1)^{\ell+i} \beta(i) \beta(\ell) \langle \mathbf{x}_\ell, \mathbf{x}_i \rangle$ . Towards the goal of bounding the activation of a  
 279 neuron with a data point we provide the following results.

280 **Lemma C.1.** *Assume  $|\langle \mathbf{n}_i, \mathbf{n}_\ell \rangle| \leq \frac{\rho}{1-\gamma}$  for all  $i, \ell \in [2n]$  such that  $i \neq \ell$ .*

- 281 1. If  $i = \ell$  then  $\lambda_{i\ell} = 1$ .
- 282 2. If  $i \neq \ell$ ,  $i \in \mathcal{S}_T$ , and  $\ell \in \mathcal{S}_F$ , then  $-(\gamma + \rho) \leq \lambda_{i\ell} \leq -(\gamma - \rho)$ .
- 283 3. If  $i \neq \ell$ ,  $i \in \mathcal{S}_F$ , and  $\ell \in \mathcal{S}_T$ , then  $-(\gamma + \rho) \leq \lambda_{i\ell} \leq -(\gamma - \rho)$ .
- 284 4. If  $i \neq \ell$  and  $i, \ell \in \mathcal{S}_T$ , then  $\gamma - \rho \leq \lambda_{i\ell} \leq \gamma + \rho$ .
- 285 5. If  $i \neq \ell$  and  $i, \ell \in \mathcal{S}_F$ , then  $\gamma - \rho \leq \lambda_{i\ell} \leq \gamma + \rho$ .

286 *Proof.* Observe by the data model, described in Section B.2, that

$$\langle \mathbf{x}_i, \mathbf{x}_\ell \rangle = (-1)^{\ell+i} (\gamma + (1 - \gamma) \beta(i) \beta(\ell) \langle \mathbf{n}_i, \mathbf{n}_\ell \rangle).$$

287 Therefore

$$\lambda_{i\ell} = \beta(i)\beta(\ell)\gamma + (1 - \gamma)\langle \mathbf{n}_i, \mathbf{n}_\ell \rangle$$

288 from which the results claimed follow.  $\square$

289 **Lemma C.2.** Assume  $|\langle \mathbf{x}_i, \mathbf{x}_\ell \rangle| \leq \frac{\rho}{1-\gamma}$  for all  $i, \ell \in [2n]$  such that  $i \neq \ell$ . Then for any  $j \in [2m]$  the  
 290 following are true.

291 1. If  $i \in \mathcal{S}_T, i \sim j$  then

$$\begin{aligned} \langle \mathbf{w}_j^{(t)}, \mathbf{x}_i \rangle &\geq \langle \mathbf{w}_j^{(t_0)}, \mathbf{x}_i \rangle + \eta \left( T_{ij}(t_0, t) + G_j^{(i)}(t_0, t)(\gamma - \rho) - B_j^{(i)}(t_0, t)(\gamma + \rho) \right) \\ \langle \mathbf{w}_j^{(t)}, \mathbf{x}_i \rangle &\leq \langle \mathbf{w}_j^{(t_0)}, \mathbf{x}_i \rangle + \eta \left( T_{ij}(t_0, t) + G_j^{(i)}(t_0, t)(\gamma + \rho) - B_j^{(i)}(t_0, t)(\gamma - \rho) \right). \end{aligned}$$

292 2. If  $i \in \mathcal{S}_T, i \not\sim j$  then

$$\begin{aligned} \langle \mathbf{w}_j^{(t)}, \mathbf{x}_i \rangle &\geq \langle \mathbf{w}_j^{(t_0)}, \mathbf{x}_i \rangle - \eta \left( T_{ij}(t_0, t) + G_j^{(i)}(t_0, t)(\gamma + \rho) - B_j^{(i)}(t_0, t)(\gamma - \rho) \right) \\ \langle \mathbf{w}_j^{(t)}, \mathbf{x}_i \rangle &\leq \langle \mathbf{w}_j^{(t_0)}, \mathbf{x}_i \rangle - \eta \left( T_{ij}(t_0, t) + G_j^{(i)}(t_0, t)(\gamma - \rho) - B_j^{(i)}(t_0, t)(\gamma + \rho) \right). \end{aligned}$$

293 3. If  $i \in \mathcal{S}_F, i \sim j$  then

$$\begin{aligned} \langle \mathbf{w}_j^{(t)}, \mathbf{x}_i \rangle &\geq \langle \mathbf{w}_j^{(t_0)}, \mathbf{x}_i \rangle - \eta \left( T_{ij}(t_0, t) - G_j^{(i)}(t_0, t)(\gamma - \rho) + B_j^{(i)}(t_0, t)(\gamma + \rho) \right) \\ \langle \mathbf{w}_j^{(t)}, \mathbf{x}_i \rangle &\leq \langle \mathbf{w}_j^{(t_0)}, \mathbf{x}_i \rangle - \eta \left( T_{ij}(t_0, t) - G_j^{(i)}(t_0, t)(\gamma + \rho) + B_j^{(i)}(t_0, t)(\gamma - \rho) \right). \end{aligned}$$

294 4. If  $i \in \mathcal{S}_F, i \not\sim j$  then

$$\begin{aligned} \langle \mathbf{w}_j^{(t)}, \mathbf{x}_i \rangle &\geq \langle \mathbf{w}_j^{(t_0)}, \mathbf{x}_i \rangle + \eta \left( T_{ij}(t_0, t) - G_j^{(i)}(t_0, t)(\gamma + \rho) + B_j^{(i)}(t_0, t)(\gamma - \rho) \right) \\ \langle \mathbf{w}_j^{(t)}, \mathbf{x}_i \rangle &\leq \langle \mathbf{w}_j^{(t_0)}, \mathbf{x}_i \rangle + \eta \left( T_{ij}(t_0, t) - G_j^{(i)}(t_0, t)(\gamma - \rho) + B_j^{(i)}(t_0, t)(\gamma + \rho) \right). \end{aligned}$$

295 *Proof.* Considering (5) we can further separate the summation term as follows,

$$\langle \mathbf{w}_j^{(t)}, \mathbf{x}_i \rangle = \langle \mathbf{w}_j^{(t_0)}, \mathbf{x}_i \rangle + (-1)^{j+i}\beta(i)\eta \left( T_{ij}(t_0, t) + \sum_{\substack{\ell \in \mathcal{S}_T \\ \ell \neq i}} T_{\ell j}(t_0, t)\lambda_{i\ell} + \sum_{\substack{\ell \in \mathcal{S}_F \\ \ell \neq i}} T_{\ell j}(t_0, t)\lambda_{i\ell} \right).$$

296 Note, with  $i \in \mathcal{S}_T$  and  $i \sim j$ , or  $i \in \mathcal{S}_F$  and  $i \not\sim j$ , then  $(-1)^{j+i}\beta(i) = 1$ . On the other hand, with  
 297  $i \in \mathcal{S}_T$  and  $i \not\sim j$ , or  $i \in \mathcal{S}_F$  and  $i \sim j$ , then  $(-1)^{j+i}\beta(i) = -1$ . Substituting the relevant bounds  
 298 on  $\lambda_{i\ell}$  provided in Lemma C.1, and observing by definition that  $G_j^{(i)}(t_0, t) = \sum_{\ell \in \mathcal{S}_T, \ell \neq i} T_{\ell j}(t_0, t)$   
 299 and  $B_j^{(i)}(t_0, t) = \sum_{\ell \in \mathcal{S}_F, \ell \neq i} T_{\ell j}(t_0, t)$ , one arrives at the results claimed.  $\square$

300 We will often make use of the following similar but more pessimistic bounds on the activations.  
 301 Recall that  $\phi$  is the ReLU function:  $\phi(a) = \max\{a, 0\}$ .

302 **Lemma C.3.** For any  $j \in [2m]$  and iterations  $t_0, t$  with  $t_0 \leq t$  the following hold:

303 1. If  $i \in \mathcal{S}_T, i \sim j$  then

$$\begin{aligned} \phi(\langle \mathbf{w}_j^{(t)}, \mathbf{x}_i \rangle) &\geq \phi(\langle \mathbf{w}_j^{(t_0)}, \mathbf{x}_i \rangle) + \eta T_{ij}(t_0, t) - \eta(\gamma + \rho)B_j(t_0, t) - \eta\phi(\rho - \gamma)G_j^{(i)}(t_0, t) \\ \phi(\langle \mathbf{w}_j^{(t)}, \mathbf{x}_i \rangle) &\leq \phi(\langle \mathbf{w}_j^{(t_0)}, \mathbf{x}_i \rangle) + \eta T_{ij}(t_0, t) + \eta(\gamma + \rho)G_j^{(i)}(t_0, t) + \eta\phi(\rho - \gamma)B_j(t_0, t). \end{aligned}$$

304 2. If  $i \in \mathcal{S}_T, i \not\sim j$  then

$$\begin{aligned} \phi(\langle \mathbf{w}_j^{(t)}, \mathbf{x}_i \rangle) &\geq \phi(\langle \mathbf{w}_j^{(t_0)}, \mathbf{x}_i \rangle) - \eta T_{ij}(t_0, t) - \eta(\gamma + \rho)G_j^{(i)}(t_0, t) - \eta\phi(\rho - \gamma)B_j(t_0, t) \\ \phi(\langle \mathbf{w}_j^{(t)}, \mathbf{x}_i \rangle) &\leq \phi(\langle \mathbf{w}_j^{(t_0)}, \mathbf{x}_i \rangle) - \eta T_{ij}(t_0, t) + \eta(\gamma + \rho)B_j(t_0, t) + \eta\phi(\rho - \gamma)G_j^{(i)}(t_0, t) + \eta. \end{aligned}$$

305 3. If  $i \in \mathcal{S}_F, i \sim j$  then

$$\begin{aligned}\phi(\langle \mathbf{w}_j^{(t)}, \mathbf{x}_i \rangle) &\geq \phi(\langle \mathbf{w}_j^{(t_0)}, \mathbf{x}_i \rangle) - \eta T_{ij}(t_0, t) - \eta(\gamma + \rho)B_j^{(i)}(t_0, t) - \eta\phi(\rho - \gamma)G_j(t_0, t) \\ \phi(\langle \mathbf{w}_j^{(t)}, \mathbf{x}_i \rangle) &\leq \phi(\langle \mathbf{w}_j^{(t_0)}, \mathbf{x}_i \rangle) - \eta T_{ij}(t_0, t) + \eta(\gamma + \rho)G_j(t_0, t) + \eta\phi(\rho - \gamma)B_j^{(i)}(t_0, t) + \eta.\end{aligned}$$

306 4. If  $i \in \mathcal{S}_F, i \not\sim j$  then

$$\begin{aligned}\phi(\langle \mathbf{w}_j^{(t)}, \mathbf{x}_i \rangle) &\geq \phi(\langle \mathbf{w}_j^{(t_0)}, \mathbf{x}_i \rangle) + \eta T_{ij}(t_0, t) - \eta(\gamma + \rho)G_j(t_0, t) - \eta\phi(\rho - \gamma)B_j^{(i)}(t_0, t) \\ \phi(\langle \mathbf{w}_j^{(t)}, \mathbf{x}_i \rangle) &\leq \phi(\langle \mathbf{w}_j^{(t_0)}, \mathbf{x}_i \rangle) + \eta T_{ij}(t_0, t) + \eta(\gamma + \rho)B_j^{(i)}(t_0, t) + \eta\phi(\rho - \gamma)G_j(t_0, t).\end{aligned}$$

307 The  $\eta$  term in the upper bound for cases 2 and 3 is only necessary if  $T_{ij}(t_0, t) > 0$ .

308 We remark that we will often use this result in a setting where  $\rho \leq \gamma$ . In these cases, the terms that  
309 involve  $\phi(\rho - \gamma)$  are zero and will be dropped.

310 *Proof.* For each of these results, we make use of Lemma C.2,  $a \leq \phi(a)$  for all  $a \in \mathbb{R}$ , and

$$\begin{aligned}0 &\leq G_j^{(i)}(t_0, t_1) \leq G_j(t_0, t_1) \\ 0 &\leq B_j^{(i)}(t_0, t_1) \leq B_j(t_0, t_1)\end{aligned}$$

311 for all  $i, j, t_0, t_1$ . We will only prove the inequalities for  $i \in \mathcal{S}_T$  here, as the inequalities for  $i \in \mathcal{S}_F$   
312 are analogous: statement 4 is just statement 1 with the roles of  $G_j(t_0, t)$  and  $B_j(t_0, t)$  switched,  
313 while statement 3 is the same for statement 2.

314 For the first inequality in statement 1 we claim it suffices to show

$$\phi(\langle \mathbf{w}_j^{(\tau+1)}, \mathbf{x}_i \rangle) \geq \phi(\langle \mathbf{w}_j^{(\tau)}, \mathbf{x}_i \rangle) + \eta T_{ij}(\tau, \tau+1) - \eta(\gamma + \rho)B_j(\tau, \tau+1) - \eta\phi(\rho - \gamma)G_j^{(i)}(\tau, \tau+1) \quad (6)$$

315 Indeed, if (6) is true then the result desired follows as

$$\begin{aligned}\phi(\langle \mathbf{w}_j^{(t)}, \mathbf{x}_i \rangle) - \phi(\langle \mathbf{w}_j^{(t_0)}, \mathbf{x}_i \rangle) &= \sum_{\tau=t_0}^{t-1} \phi(\langle \mathbf{w}_j^{(\tau+1)}, \mathbf{x}_i \rangle) - \phi(\langle \mathbf{w}_j^{(\tau)}, \mathbf{x}_i \rangle) \\ &\geq \sum_{\tau=t_0}^{t-1} \left( \eta T_{ij}(\tau, \tau+1) - \eta(\gamma + \rho)B_j(\tau, \tau+1) \right. \\ &\quad \left. - \eta\phi(\rho - \gamma)G_j^{(i)}(\tau, \tau+1) \right) \\ &= \eta T_{ij}(t_0, t) - \eta(\gamma + \rho)B_j(t_0, t) - \eta\phi(\rho - \gamma)G_j^{(i)}(t_0, t).\end{aligned}$$

316 In order to prove (6) we bound

$$\begin{aligned}\phi(\langle \mathbf{w}_j^{(\tau+1)}, \mathbf{x}_i \rangle) &\geq \langle \mathbf{w}_j^{(\tau+1)}, \mathbf{x}_i \rangle \\ &\geq \langle \mathbf{w}_j^{(\tau)}, \mathbf{x}_i \rangle + \eta T_{ij}(\tau, \tau+1) - \eta(\gamma + \rho)B_j(\tau, \tau+1) \\ &\quad - \phi(\rho - \gamma)G_j^{(i)}(\tau, \tau+1).\end{aligned}$$

317 This follows from statement 1 in Lemma C.2. From here, we consider two cases: first, if  $\langle \mathbf{w}_j^{(\tau)}, \mathbf{x}_i \rangle \geq$   
318 0 then  $\langle \mathbf{w}_j^{(\tau)}, \mathbf{x}_i \rangle = \phi(\langle \mathbf{w}_j^{(\tau)}, \mathbf{x}_i \rangle)$  and so (6) clearly holds. Alternatively, if  $\langle \mathbf{w}_j^{(\tau)}, \mathbf{x}_i \rangle < 0$  then  
319  $T_{ij}(\tau, \tau+1) = 0$ ,  $\phi(\langle \mathbf{w}_j^{(\tau)}, \mathbf{x}_i \rangle) = 0$  and as a result the right-hand-side of (6) is non-positive while  
320 the left is non-negative. As such (6) holds trivially.

321 For the second equality in statement 1 we bound

$$\begin{aligned}\langle \mathbf{w}_j^{(t)}, \mathbf{x}_i \rangle &\leq \langle \mathbf{w}_j^{(t_0)}, \mathbf{x}_i \rangle + \eta \left( T_{ij}(t_0, t) + G_j^{(i)}(t_0, t)(\gamma + \rho) - B_j^{(i)}(t_0, t)(\gamma - \rho) \right) \\ &\leq \phi(\langle \mathbf{w}_j^{(t_0)}, \mathbf{x}_i \rangle) + \eta T_{ij}(t_0, t) + \eta(\gamma + \rho)G_j^{(i)}(t_0, t) + \eta\phi(\rho - \gamma)B_j(t_0, t).\end{aligned}$$

Since the right-hand side is non-negative, this inequality is true even if we replace the left-hand side by  $\phi(\langle \mathbf{w}_j^{(t)}, \mathbf{x}_i \rangle)$ .

We now proceed to statement 2. For the first inequality, notice that if  $\phi(\langle \mathbf{w}_j^{(t_0)}, \mathbf{x}_i \rangle) = 0$  then the right-hand side is non-positive and therefore the inequality trivially holds. Otherwise, it must be the case that  $\phi(\langle \mathbf{w}_j^{(t_0)}, \mathbf{x}_i \rangle) = \langle \mathbf{w}_j^{(t_0)}, \mathbf{x}_i \rangle$ . Using statement 2 from Lemma C.2, we obtain the bound

$$\begin{aligned} \phi(\langle \mathbf{w}_j^{(t)}, \mathbf{x}_i \rangle) &\geq \langle \mathbf{w}_j^{(t)}, \mathbf{x}_i \rangle \\ &\geq \langle \mathbf{w}_j^{(t_0)}, \mathbf{x}_i \rangle - \eta \left( T_{ij}(t_0, t) + G_j^{(i)}(t_0, t)(\gamma + \rho) - B_j^{(i)}(t_0, t)(\gamma - \rho) \right) \\ &\geq \phi(\langle \mathbf{w}_j^{(t_0)}, \mathbf{x}_i \rangle) - \eta T_{ij}(t_0, t) - \eta(\gamma + \rho)G_j^{(i)}(t_0, t) - \eta\phi(\rho - \gamma)B_j(t_0, t). \end{aligned}$$

We now turn to the second inequality in statement 2. The corresponding statement from Lemma C.2 yields

$$\begin{aligned} \langle \mathbf{w}_j^{(t)}, \mathbf{x}_i \rangle &\leq \langle \mathbf{w}_j^{(t_0)}, \mathbf{x}_i \rangle - \eta T_{ij}(t_0, t) + \eta(\gamma + \rho)B_j(t_0, t) + \eta\phi(\rho - \gamma)G_j^{(i)}(t_0, t) \\ &\leq \phi(\langle \mathbf{w}_j^{(t_0)}, \mathbf{x}_i \rangle) - \eta T_{ij}(t_0, t) + \eta(\gamma + \rho)B_j(t_0, t) + \eta\phi(\rho - \gamma)G_j^{(i)}(t_0, t) \\ &\leq \phi(\langle \mathbf{w}_j^{(t_0)}, \mathbf{x}_i \rangle) - \eta T_{ij}(t_0, t) + \eta(\gamma + \rho)B_j(t_0, t) + \eta\phi(\rho - \gamma)G_j^{(i)}(t_0, t) + \eta, \end{aligned} \quad (7)$$

we remark that the reason for the addition of  $\eta$  to the right-hand-side will soon become apparent. The desired inequality holds as long as the right-hand-side is non-negative, we therefore proceed by induction to prove

$$\phi(\langle \mathbf{w}_j^{(t_0)}, \mathbf{x}_i \rangle) - \eta T_{ij}(t_0, \tau) + \eta(\gamma + \rho)B_j(t_0, \tau) + \eta\phi(\rho - \gamma)G_j^{(i)}(t_0, \tau) + \eta \geq 0$$

for  $\tau \geq t_0$ . The base case  $\tau = t_0$  is trivial, assume then that the induction hypothesis holds for some  $\tau \geq t_0$ . For iteration  $\tau + 1$  there are two cases to consider: first, if  $\langle \mathbf{w}_j^{(\tau)}, \mathbf{x}_i \rangle < 0$  then  $T_{ij}(t_0, \tau + 1) = T_{ij}(t_0, \tau)$ . In addition, as  $B_j(t_0, \tau) \leq B_j(t_0, \tau + 1)$  and  $G_j^{(i)}(t_0, \tau) \leq G_j^{(i)}(t_0, \tau + 1)$  then

$$\begin{aligned} 0 &\leq \phi(\langle \mathbf{w}_j^{(t_0)}, \mathbf{x}_i \rangle) - \eta T_{ij}(t_0, \tau) + \eta(\gamma + \rho)B_j(t_0, \tau) + \eta\phi(\rho - \gamma)G_j^{(i)}(t_0, \tau) + \eta \\ &\leq \phi(\langle \mathbf{w}_j^{(t_0)}, \mathbf{x}_i \rangle) - \eta T_{ij}(t_0, \tau + 1) + \eta(\gamma + \rho)B_j(t_0, \tau + 1) + \eta\phi(\rho - \gamma)G_j^{(i)}(t_0, \tau + 1) + \eta \end{aligned}$$

by the induction hypothesis. Alternatively, if instead  $\langle \mathbf{w}_j^{(\tau)}, \mathbf{x}_i \rangle \geq 0$  one may use the second inequality from (7) to conclude that

$$0 \leq \langle \mathbf{w}_j^{(\tau)}, \mathbf{x}_i \rangle \leq \phi(\langle \mathbf{w}_j^{(t_0)}, \mathbf{x}_i \rangle) - \eta T_{ij}(t_0, \tau) + \eta(\gamma + \rho)B_j(t_0, \tau) + \eta\phi(\rho - \gamma)G_j^{(i)}(t_0, \tau).$$

In addition, as  $T_{ij}(t_0, \tau + 1) \leq T_{ij}(t_0, \tau) + 1$  it follows that

$$\begin{aligned} 0 &\leq \phi(\langle \mathbf{w}_j^{(t_0)}, \mathbf{x}_i \rangle) - \eta T_{ij}(t_0, \tau) + \eta(\gamma + \rho)B_j(t_0, \tau) + \eta\phi(\rho - \gamma)G_j^{(i)}(t_0, \tau) \\ &\leq \phi(\langle \mathbf{w}_j^{(t_0)}, \mathbf{x}_i \rangle) - \eta T_{ij}(t_0, \tau + 1) + \eta(\gamma + \rho)B_j(t_0, \tau + 1) + \eta\phi(\rho - \gamma)G_j^{(i)}(t_0, \tau + 1) + \eta \end{aligned}$$

which completes the induction.

Lastly, we consider the final remark in the statement of the lemma. If  $T_{ij}(t_0, t) = 0$  then the right hand side of the second line in (7) is non-negative trivially, so we do not need the additional  $\eta$  term.  $\square$

## C.2 Useful convergence lemmas

**Lemma C.4.** For any iterations  $t, t_0$  satisfying  $t \geq t_0$ ,

1. if  $i \in \mathcal{S}_T$  then

$$y_i f(t, \mathbf{x}_i) \geq y_i f(t_0, \mathbf{x}_i) + \eta(T_i(t_0, t) - (\gamma + \rho)B(t_0, t) - \phi(\rho - \gamma)G^{(i)}(t_0, t) - m),$$

2. if  $i \in \mathcal{S}_F$  then

$$y_i f(t, \mathbf{x}_i) \geq y_i f(t_0, \mathbf{x}_i) + \eta(T_i(t_0, t) - (\gamma + \rho)G(t_0, t) - \phi(\rho - \gamma)B^{(i)}(t_0, t) - m).$$

347 *Proof.* Both statements follow from the bounds provided in Lemma C.3. For Statement 1

$$\begin{aligned}
y_i f(t, \mathbf{x}_i) &= \sum_{j \sim i} \phi(\langle \mathbf{w}_j^{(t)}, \mathbf{x}_i \rangle) - \sum_{j \not\sim i} \phi(\langle \mathbf{w}_j^{(t)}, \mathbf{x}_i \rangle) \\
&\geq \sum_{j \sim i} \left( \phi(\langle \mathbf{w}_j^{(t_0)}, \mathbf{x}_i \rangle) + \eta T_{ij}(t_0, t) - \eta(\gamma + \rho) B_j(t_0, t) - \eta \phi(\rho - \gamma) G_j^{(i)}(t_0, t) \right) \\
&\quad - \sum_{j \not\sim i} \left( \phi(\langle \mathbf{w}_j^{(t_0)}, \mathbf{x}_i \rangle) - \eta T_{ij}(t_0, t) + \eta(\gamma + \rho) B_j(t_0, t) + \eta \phi(\rho - \gamma) G_j^{(i)}(t_0, t) + \eta \right) \\
&= y_i f(t_0, \mathbf{x}_i) + \eta(T_i(t_0, t) - (\gamma + \rho)B(t_0, t) - \phi(\rho - \gamma)G^{(i)}(t_0, t) - m).
\end{aligned}$$

348 For Statement 2

$$\begin{aligned}
y_i f(t, \mathbf{x}_i) &= \sum_{j \sim i} \phi(\langle \mathbf{w}_j^{(t)}, \mathbf{x}_i \rangle) - \sum_{j \not\sim i} \phi(\langle \mathbf{w}_j^{(t)}, \mathbf{x}_i \rangle) \\
&\geq \sum_{j \sim i} \left( \phi(\langle \mathbf{w}_j^{(t_0)}, \mathbf{x}_i \rangle) + \eta T_{ij}(t_0, t) - \eta(\gamma + \rho) G_j(t_0, t) - \eta \phi(\rho - \gamma) B_j^{(i)}(t_0, t) \right) \\
&\quad - \sum_{j \not\sim i} \left( \phi(\langle \mathbf{w}_j^{(t_0)}, \mathbf{x}_i \rangle) - \eta T_{ij}(t_0, t) + \eta(\gamma + \rho) G_j(t_0, t) + \eta \phi(\rho - \gamma) B_j^{(i)}(t_0, t) + \eta \right) \\
&\geq y_i f(t_0, \mathbf{x}_i) + \eta(T_i(t_0, t) - (\gamma + \rho)G(t_0, t) - \phi(\rho - \gamma)B^{(i)}(t_0, t) - m). \quad \square
\end{aligned}$$

349 **Lemma C.5.** Let  $t \geq t_0$ . For  $i \in \mathcal{S}_T$ ,

$$T_i(t_0, t) \leq \frac{\ell(t_0, \mathbf{x}_i)}{\eta} + (\gamma + \rho)B(t_0, t) + \phi(\rho - \gamma)G^{(i)}(t_0, t) + 3m.$$

350 For  $i \in \mathcal{S}_F$ ,

$$T_i(t_0, t) \leq \frac{\ell(t_0, \mathbf{x}_i)}{\eta} + (\gamma + \rho)G(t_0, t) + \phi(\rho - \gamma)B^{(i)}(t_0, t) + 3m.$$

351 *Proof.* We will show this for  $i \in \mathcal{S}_T$ ; the  $i \in \mathcal{S}_F$  case is similar. We proceed by induction on  $t$ .  
352 If  $t = t_0$  this holds trivially because the left-hand side is zero and the right-hand side is positive.  
353 Otherwise, assume the desired inequality holds at iteration  $t$ . By Lemma C.4 and our assumption on  
354  $\ell(t_0, \mathbf{x}_i)$ ,

$$\begin{aligned}
y_i f(t, \mathbf{x}_i) &\geq y_i f(t_0, \mathbf{x}_i) + \eta(T_i(t_0, t) - (\gamma + \rho)B(t_0, t) - \phi(\rho - \gamma)G^{(i)}(t_0, t) - m) \\
&\geq (1 - a) + \eta(T_i(t_0, t) - (\gamma + \rho)B(t_0, t) - \phi(\rho - \gamma)G^{(i)}(t_0, t) - m).
\end{aligned}$$

355 We consider two cases:

356 1. If  $\eta(T_i(t_0, t) - (\gamma + \rho)B(t_0, t) - \phi(\rho - \gamma)G^{(i)}(t_0, t) - m) \geq a$  then we see that  $\ell(t, \mathbf{x}_i) = 0$ .  
357 Therefore,

$$\begin{aligned}
T_i(t_0, t+1) &= T_i(t_0, t) \\
&\leq \frac{a}{\eta} + (\gamma + \rho)B(t_0, t) + 3m \\
&\leq \frac{a}{\eta} + (\gamma + \rho)B(t_0, t+1) + 3m
\end{aligned}$$

358 2. Otherwise,  $T_i(t_0, t) \leq \frac{a}{\eta} + (\gamma + \rho)B(t_0, t) + \phi(\rho - \gamma)G^{(i)}(t_0, t) + m$ . Since there are only  
359  $2m$  neurons, we bound

$$\begin{aligned}
T_i(t_0, t+1) &= T_i(t_0, t) + 2m \\
&\leq \left( \frac{a}{\eta} + (\gamma + \rho)B(t_0, t) + \phi(\rho - \gamma)G^{(i)}(t_0, t) + m \right) + 2m \\
&\leq \frac{a}{\eta} + (\gamma + \rho)B(t_0, t+1) + \phi(\rho - \gamma)G^{(i)}(t_0, t) + 3m.
\end{aligned}$$

360

□

## D Benign overfitting

**Assumption 1.** Let  $\delta \in (0, 1)$ . With  $n \geq C/\delta$  and  $\eta \leq c$  then for benign overfitting we assume the following conditions on the other data and model hyperparameters.

1.  $k < \frac{n}{100}$ ,
2.  $5\sqrt{2\log(2en^2/\delta)/d} \leq \gamma \leq \frac{4}{5n}$
3.  $\lambda_w \leq \frac{\eta\gamma}{4}$ ,
4.  $m \geq C \log(n)$
5.  $d \geq 3\rho^{-2} \ln\left(\frac{6n^2}{\delta}\right)$  where  $\rho \leq \frac{\gamma}{5}$

We remark that under these conditions then for sufficiently large  $n$ ,  $\rho$  as defined above clearly satisfies the inequalities  $\rho \leq \min\left\{\frac{n-3k}{n+k}\gamma, \frac{1}{6(n-k)}\right\}$  and  $\gamma + \rho < \min\left\{\sqrt{\frac{1}{4(n-k)k}}, \frac{1}{n-k}, \frac{1}{99k}, \frac{1}{100}\right\}$ . In addition to the assumptions detailed in Assumption 1, for convenience we assume three further conditions hold.

**Assumption 2.** In addition to the assumptions detailed in Assumption 1, assume the following conditions hold.

1.  $|\Gamma_p| > 0.99m$  for  $p \in \{-1, 1\}$ .
2. For all  $i \in \mathcal{S}_F$  there is  $j \in \Gamma_{y_i}$  such that  $i \in \mathcal{A}_j^{(0)}$ .
3. For all  $i, l \in [2n]$ ,  $i \neq l$   $|\langle \mathbf{n}_i, \mathbf{n}_l \rangle| \leq \frac{\rho}{1-\gamma}$ .

As shown in the following lemma, these two additional conditions hold with high probability over the randomness of the initialization and training set.

**Lemma D.1.** The extra conditions of Assumption 2 hold with probability at least  $1 - \delta$ .

*Proof.* Using Lemma B.3, then for sufficiently large  $n$  there exists a constant  $c$  such that the probability the first condition does not hold is at most  $\exp(-cn)$ . Alternatively, setting  $\delta \geq 3 \exp(-cn)$  and rearranging, as long as  $n \geq C \ln\left(\frac{3}{\delta}\right)$  then the probability the first condition does not hold is at most  $\delta/3$ . Using Lemma B.4 then the probability condition two does not hold is at most  $C/n$  for some large constant  $C$ , therefore as long as  $n \geq C/\delta$  then the probability the second condition does not hold is at most  $\delta/3$ . Using Lemma B.1, observing  $\frac{\rho}{1-\gamma} > \rho$  and under the conditions of the lemma that  $3\rho^{-2} \ln(6n^2) > 6$ , then as long as

$$d \geq 3\rho^{-2} \ln\left(\frac{6n^2}{\delta}\right)$$

the probability that the third condition does not hold is also at most  $\delta/3$ . Using the union bound we therefore conclude that all three properties hold with probability at least  $\delta$ .  $\square$

### D.1 Proof of Lemma 3.2

**Lemma D.2** (Lemma 3.2). Assume Assumption 2 holds. Suppose further that at some epoch  $t_0$  the loss of every clean point is bounded above by  $a \in \mathbb{R}_{\geq 0}$ , while the loss of every corrupted point is bounded above by  $b \in \mathbb{R}_{\geq 0}$ . Then the total number of updates which occurs after this epoch is upper bounded as follows,

$$G(t_0, t) \leq \frac{2(n-k)}{1-4k(n-k)(\gamma+\rho)^2} \left( \frac{a}{\eta} + 3m + 2k(\gamma+\rho) \left( \frac{b}{\eta} + 3m \right) \right)$$

$$B(t_0, t) \leq \frac{2k}{1-4k(n-k)(\gamma+\rho)^2} \left( \frac{b}{\eta} + 3m + 2(n-k)(\gamma+\rho) \left( \frac{a}{\eta} + 3m \right) \right)$$

for all  $t \geq t_0$ .

396 *Proof.* From Lemma C.5,  $\rho \leq \gamma$ , and the assumption on  $a$  and  $b$ ,

$$G(t_0, t) = \sum_{i \in \mathcal{S}_T} T_i(t_0, t) \leq 2(n - k) \left( \frac{a}{\eta} + (\gamma + \rho)B(t_0, t) + 3m \right),$$

$$B(t_0, t) = \sum_{i \in \mathcal{S}_F} T_i(t_0, t) \leq 2k \left( \frac{b}{\eta} + (\gamma + \rho)G(t_0, t) + 3m \right).$$

397 Substituting these bounds into each other, and as  $\gamma + \rho < (4(n - k)k)^{-1/2}$  (Assumption 2), we  
 398 arrive at the epoch independent bound on the number of updates as claimed in the statement of the  
 399 theorem.  $\square$

## 400 D.2 Early training and proof of Lemma 3.3

401 **Lemma D.3.** *Assuming Assumption 2, then for  $i \in \mathcal{S}_T$  and  $j \in \Gamma$  it follows that  $\langle \mathbf{w}_j^{(1)}, \mathbf{x}_i \rangle > 0$  iff*  
 402  *$i \sim j$ . For  $i \in \mathcal{S}_F$ ,  $j \in \Theta_p$ , and  $i \not\sim j$  it follows that  $\langle \mathbf{w}_j^{(1)}, \mathbf{x}_i \rangle > 0$  if  $i \in \mathcal{A}_j^{(0)}$ .*

403 *Proof.* Suppose  $j \in \Gamma$ ,  $i \sim j$ ,  $i \in \mathcal{S}_T$ . Recall from definition of  $\Gamma_p$  that  $G_j^{(i)}(0, 1)(\gamma - \rho) -$   
 404  $B_j^{(i)}(0, 1)(\gamma + \rho) \geq \frac{2\lambda_w}{\eta}$ . Using Lemma C.2

$$\begin{aligned} \langle \mathbf{w}_j^{(1)}, \mathbf{x}_i \rangle &\geq \langle \mathbf{w}_j^{(0)}, \mathbf{x}_i \rangle + \eta \left( T_{ij}(0, 1) + G_j^{(i)}(0, 1)(\gamma - \rho) - B_j^{(i)}(0, 1)(\gamma + \rho) \right) \\ &> \langle \mathbf{w}_j^{(0)}, \mathbf{x}_i \rangle + \eta (G_j(0, 1)(\gamma - \rho) - B_j(0, 1)(\gamma + \rho)) \\ &\geq \langle \mathbf{w}_j^{(0)}, \mathbf{x}_i \rangle + 2\lambda_w \\ &> \lambda_w. \end{aligned}$$

405 On the other hand, if  $i \not\sim j$  then again from Lemma C.2

$$\begin{aligned} \langle \mathbf{w}_j^{(1)}, \mathbf{x}_i \rangle &\leq \langle \mathbf{w}_j^{(0)}, \mathbf{x}_i \rangle - \eta \left( T_{ij}(0, 1) + G_j^{(i)}(0, 1)(\gamma - \rho) - B_j^{(i)}(0, 1)(\gamma + \rho) \right) \\ &\leq \langle \mathbf{w}_j^{(0)}, \mathbf{x}_i \rangle - \eta (G_j(0, 1)(\gamma - \rho) - B_j(0, 1)(\gamma + \rho)) \\ &\leq -\lambda_w. \end{aligned}$$

406 Now consider  $i \in \mathcal{S}_F$ ,  $i \not\sim j$ , and  $i \in \mathcal{A}_j^{(0)}$ . By Lemma C.2 and the definition of  $\Theta$ ,

$$\begin{aligned} \langle \mathbf{w}_j^{(1)}, \mathbf{x}_i \rangle &\geq \langle \mathbf{w}_j^{(0)}, \mathbf{x}_i \rangle + \eta \left( T_{ij}(0, 1) + B_j^{(i)}(0, 1)(\gamma - \rho) - G_j^{(i)}(0, 1)(\gamma + \rho) \right) \\ &> \eta(1 - \gamma + \rho) + \eta (B_j(0, 1)(\gamma - \rho) - G_j(0, 1)(\gamma + \rho)) \\ &\geq 0. \end{aligned} \quad \square$$

407 **Lemma D.4** (Lemma 3.3). *Suppose Assumption 2 holds. Let  $j \in \Gamma_p$ . Let  $0 < t < \mathcal{T}_0$ . A point*  
 408  *$i \in \mathcal{A}_j^{(t)}$  if one of the following conditions hold:*

- 409 1.  $i \in \mathcal{S}_T$  and  $i \sim j$
- 410 2.  $i \in \mathcal{S}_F$ ,  $i \not\sim j$ , and  $i \in \mathcal{A}_j^{(1)}$ .

411 *Furthermore, if one of the following conditions hold, then  $i \notin \mathcal{A}_j^{(t)}$ :*

- 412 1.  $i \in \mathcal{S}_T$  and  $i \not\sim j$
- 413 2.  $i \in \mathcal{S}_F$ ,  $i \not\sim j$ , and  $i \notin \mathcal{A}_j^{(1)}$ .

414 *Proof.* We proceed by induction. For  $t = 1$ , the  $i \in \mathcal{S}_T$  case was shown in Lemma D.3 and the  
 415  $i \in \mathcal{S}_F$ ,  $i \not\sim j$  case is clear. Now, suppose the lemma holds for iteration  $t$  and consider iteration  $t + 1$ .

416 First let  $i \in \mathcal{S}_F$ ,  $i \not\sim j$ . If  $i \in \mathcal{A}_j^{(1)}$  then

$$\begin{aligned}\langle \mathbf{w}_j^{(t+1)}, \mathbf{x}_i \rangle &\geq \langle \mathbf{w}_j^{(t)}, \mathbf{x}_i \rangle + \eta \left( T_{ij}(t, t+1) - G_j^{(i)}(t, t+1)(\gamma + \rho) + B_j^{(i)}(t, t+1)(\gamma - \rho) \right) \\ &> \eta(1 - (n - k)(\gamma + \rho)) \\ &\geq 0.\end{aligned}$$

417 Here the first line is Lemma C.2, the second line comes from the inductive hypothesis, and the third  
418 line comes from  $(\gamma + \rho) < \frac{1}{n-k}$  (Assumption 2). If  $i \notin \mathcal{A}_j^{(1)}$  then

$$\begin{aligned}\langle \mathbf{w}_j^{(t+1)}, \mathbf{x}_i \rangle &\leq \langle \mathbf{w}_j^{(t)}, \mathbf{x}_i \rangle + \eta \left( T_{ij}(t, t+1) - G_j^{(i)}(t, t+1)(\gamma - \rho) + B_j^{(i)}(t, t+1)(\gamma + \rho) \right) \\ &< \eta(-(n - k)(\gamma - \rho) + 2k(\gamma + \rho)) \\ &= -\eta((n - 3k)\gamma - (n + k)\rho) \\ &\leq 0.\end{aligned}$$

419 Again, the first line is Lemma C.2, the second line uses the inductive hypothesis, and the fourth line  
420 uses  $\rho \leq \frac{n-3k}{n+k}\gamma$  (Assumption 2).

421 Now, let  $i \in \mathcal{S}_T$ . We again use, in order, Lemma C.2, the inductive hypothesis, and  $\rho \leq \frac{n-3k}{n+k}\gamma$ . If  
422  $i \sim j$  then

$$\begin{aligned}\langle \mathbf{w}_j^{(t+1)}, \mathbf{x}_i \rangle &\geq \langle \mathbf{w}_j^{(t)}, \mathbf{x}_i \rangle + \eta \left( T_{ij}(t, t+1) + G_j^{(i)}(t, t+1)(\gamma - \rho) - B_j^{(i)}(t, t+1)(\gamma + \rho) \right) \\ &> \eta(1 + \rho - \gamma) + \eta((n - k)(\gamma - \rho) - 2k(\gamma + \rho)) \\ &> 0.\end{aligned}$$

423 If  $i \not\sim j$  then

$$\begin{aligned}\langle \mathbf{w}_j^{(t+1)}, \mathbf{x}_i \rangle &\leq \langle \mathbf{w}_j^{(t)}, \mathbf{x}_i \rangle - \eta \left( T_{ij}(t, t+1) + G_j^{(i)}(t, t+1)(\gamma - \rho) - B_j^{(i)}(t, t+1)(\gamma + \rho) \right) \\ &< -\eta((n - k)(\gamma - \rho) - 2k(\gamma + \rho)) \\ &= -\eta((n - 3k)\gamma - (n + k)\rho) \\ &\leq 0.\end{aligned}$$

□

424 **Lemma D.5.** Suppose Assumption 2 holds. For all  $t_0 \leq t_1 < \mathcal{T}_0$ ,

$$G_j(t_0, t_1) \leq (n - k)(t_1 - t_0 + 2) + \frac{1}{\gamma - \rho}$$

425 *Proof.* First we claim that for all  $i \in \mathcal{S}_T$ ,  $j \not\sim i$ , and  $t < \mathcal{T}_0$ ,

$$\langle \mathbf{w}_j^{(t)}, \mathbf{x}_i \rangle \leq \lambda_w + 2\eta k(\gamma + \rho).$$

426 We prove the claim by induction. The base case  $t = 0$  follows because  $\langle \mathbf{w}_j^{(0)}, \mathbf{x}_i \rangle \leq \lambda_w$ . Now  
427 suppose it is true at iteration  $t$ . If  $\langle \mathbf{w}_j^{(t)}, \mathbf{x}_i \rangle > 0$  then by Lemma C.2,

$$\begin{aligned}\langle \mathbf{w}_j^{(t+1)}, \mathbf{x}_i \rangle &\leq \langle \mathbf{w}_j^{(t)}, \mathbf{x}_i \rangle - \eta T_{ij}(t, t+1) + \eta(\gamma + \rho)B_j(t, t+1) \\ &\leq \langle \mathbf{w}_j^{(t)}, \mathbf{x}_i \rangle - \eta(1 - 2k(\gamma + \rho)) \\ &\leq \langle \mathbf{w}_j^{(t)}, \mathbf{x}_i \rangle\end{aligned}$$

428 using  $\gamma + \rho < \frac{1}{2k}$ . From this, the claim follows. Otherwise,

$$\begin{aligned}\langle \mathbf{w}_j^{(t+1)}, \mathbf{x}_i \rangle &\leq \langle \mathbf{w}_j^{(t)}, \mathbf{x}_i \rangle - \eta T_{ij}(t, t+1) + \eta(\gamma + \rho)B_j(t, t+1) \\ &\leq 2\eta k(\gamma + \rho).\end{aligned}$$

429 We now turn to the statement of the lemma, again proceeding by induction. The base case  $t_1 = t_0$  is  
430 clear. Otherwise, we consider two cases:

431 1. If  $G_j(t_0, t_1) > \frac{1+2k(t_1-t_0+1)(\gamma+\rho)}{\gamma-\rho}$  then for all  $i \in \mathcal{S}_T$  and  $j \not\sim i$ , by Lemma C.2,

$$\begin{aligned} \langle \mathbf{w}_j^{(t_1)}, \mathbf{x}_i \rangle &\leq \langle \mathbf{w}_j^{(t_0)}, \mathbf{x}_i \rangle - \eta \left( T_{ij}(t_0, t_1) + G_j^{(i)}(t_0, t_1)(\gamma - \rho) - B_j^{(i)}(t_0, t_1)(\gamma + \rho) \right) \\ &\leq \langle \mathbf{w}_j^{(t_0)}, \mathbf{x}_i \rangle - \eta (G_j(t_0, t_1)(\gamma - \rho) - B_j(t_0, t_1)(\gamma + \rho)) \\ &< (\lambda_w + 2\eta k(\gamma + \rho)) + 2\eta k(t_1 - t_0)(\gamma + \rho) - \eta G_j(t_0, t_1)(\gamma - \rho) \\ &\leq 0 \end{aligned}$$

432 by the claim and  $\lambda_w < \eta$  (Assumption 2). Therefore,  $G_j(t_0, t_1 + 1) \leq G_j(t_0, t_1) + (n - k)$ .

433 2. If  $G_j(t_0, t_1) \leq \frac{1+2k(t_1-t_0+1)(\gamma+\rho)}{\gamma-\rho}$ , then

$$\begin{aligned} G_j(t_0, t_1 + 1) &\leq \frac{1 + 2k(t_1 - t_0 + 1)(\gamma + \rho)}{\gamma - \rho} + 2(n - k) \\ &\leq \frac{1}{\gamma - \rho} + \frac{2k(t_1 - t_0 + 1)(n - k)}{2k} + 2(n - k) \\ &\leq \frac{1}{\gamma - \rho} + (t_1 - t_0 + 3)(n - k). \end{aligned} \quad \square$$

434 **Lemma D.6.** Suppose Assumption 2 holds. For all  $t < \mathcal{T}_0$ ,  $i \in \mathcal{S}_F$ , and  $i \sim j$ ,

$$\langle \mathbf{w}_j^{(t)}, \mathbf{x}_i \rangle \leq (\lambda_w + 2\eta k(\gamma - \rho)) + 2\eta(\gamma + \rho)(n - k) + \frac{\eta(\gamma + \rho)}{\gamma - \rho}$$

435 *Proof.* Consider  $t < \mathcal{T}_0$ . We consider three cases

436 1. If  $t = 0$  then

$$\langle \mathbf{w}_j^{(0)}, \mathbf{x}_i \rangle \leq \lambda_w.$$

437 2. If  $\langle \mathbf{w}_j^{(t-1)}, \mathbf{x}_i \rangle \leq 0$  then by Lemma C.2

$$\begin{aligned} \langle \mathbf{w}_j^{(t)}, \mathbf{x}_i \rangle &\leq \langle \mathbf{w}_j^{(t-1)}, \mathbf{x}_i \rangle \\ &\quad - \eta \left( T_{ij}(t-1, t) - G_j^{(i)}(t-1, t)(\gamma + \rho) + B_j^{(i)}(t-1, t)(\gamma - \rho) \right) \\ &\leq 2\eta k(\gamma - \rho). \end{aligned}$$

438 3. If  $\langle \mathbf{w}_j^{(t-1)}, \mathbf{x}_i \rangle > 0$  then let  $t' < t$  be the smallest iteration such that  $\langle \mathbf{w}_j^{(\tau)}, \mathbf{x}_i \rangle > 0$  for all  
439  $t' \leq \tau < t$ . By Lemma C.2, Lemma D.5, and the previous two cases above,

$$\begin{aligned} \langle \mathbf{w}_j^{(t)}, \mathbf{x}_i \rangle &\leq \langle \mathbf{w}_j^{(t')}, \mathbf{x}_i \rangle - \eta \left( T_{ij}(t', t) - G_j^{(i)}(t', t)(\gamma + \rho) + B_j^{(i)}(t', t)(\gamma - \rho) \right) \\ &\leq (\lambda_w + 2\eta k(\gamma - \rho)) \\ &\quad - \eta \left( [1 - (\gamma + \rho)(n - k)](t - t') - 2(\gamma + \rho)(n - k) - \frac{\gamma + \rho}{\gamma - \rho} \right). \end{aligned}$$

440 By  $\gamma + \rho < \frac{1}{n-k}$  (Assumption 2) we conclude

$$\langle \mathbf{w}_j^{(t)}, \mathbf{x}_i \rangle \leq (\lambda_w + 2\eta k(\gamma - \rho)) + 2\eta(\gamma + \rho)(n - k) + \frac{\eta(\gamma + \rho)}{\gamma - \rho}. \quad \square$$

### 441 D.3 Proof of Lemma 3.4

442 **Lemma D.7** (Lemma 3.4). Suppose Assumption 2 holds. There is an iteration  $\mathcal{T}_1 < \mathcal{T}_0$  during  
443 training and expressions  $C_1$ ,  $C_2$ , and  $C_3$  where the following hold:

444 1. For all  $p \in \{-1, 1\}$ ,  $j \in \Gamma_p$ ,  $i \sim j$ , and  $i \in \mathcal{S}_T$ ,

$$\langle \mathbf{w}_j^{(\mathcal{T}_1)}, \mathbf{x}_i \rangle \geq \frac{3}{4m}.$$

445 2. For all  $p \in \{-1, 1\}$ ,  $j \in \Gamma_p$ ,  $i \not\sim j$ , and  $i \in \mathcal{S}_T$ ,

$$\langle \mathbf{w}_j^{(\tau_1)}, \mathbf{x}_i \rangle \leq -\frac{3n\gamma}{4m}.$$

446 3. For all  $i \in \mathcal{S}_T$ ,

$$\ell(\mathcal{T}_1, \mathbf{x}_i) \leq \frac{1}{3}.$$

447 Furthermore,

$$\mathcal{T}_1 = \frac{1}{1.03\eta m(1 + (\gamma + \rho)(n - k))} + O(1)$$

448 *Proof.* Fix  $i \in \mathcal{S}_T$ . At every iteration  $1 \leq t < \mathcal{T}_0$ , we bound

$$\begin{aligned} \ell(t, \mathbf{x}_i) - \ell(t+1, \mathbf{x}_i) &= y_i[f(t+1, \mathbf{x}_i) - f(t, \mathbf{x}_i)] \\ &= \sum_{j=1}^{2m} (-1)^{i+j} [\phi(\langle \mathbf{w}_j^{(t+1)}, \mathbf{x}_i \rangle) - \phi(\langle \mathbf{w}_j^{(t)}, \mathbf{x}_i \rangle)] \\ &= \sum_{j \notin \Gamma_{(-1)^{i+1}}} (-1)^{i+j} [\phi(\langle \mathbf{w}_j^{(t+1)}, \mathbf{x}_i \rangle) - \phi(\langle \mathbf{w}_j^{(t)}, \mathbf{x}_i \rangle)] \\ &\leq \eta \sum_{j \notin \Gamma_{(-1)^{i+1}}} T_{ij}(t, t+1) + (\gamma + \rho) G_j^{(i)}(t, t+1) \\ &= \eta \left( \sum_{j \in \Gamma_{(-1)^i}} T_{ij}(t, t+1) + (\gamma + \rho) G_j^{(i)}(t, t+1) \right) \\ &\quad + \eta \left( \sum_{j \notin \Gamma} T_{ij}(t, t+1) + (\gamma + \rho) G_j^{(i)}(t, t+1) \right) \\ &\leq \eta 0.99m[1 + (\gamma + \rho)(n - k)] + 0.02\eta m[1 + 2(\gamma + \rho)(n - k)], \end{aligned}$$

449 where we use in order:  $t < \mathcal{T}_0$ , the definition of  $f(t, \mathbf{x})$ , Lemma D.4, Lemma C.3,  $\Gamma_{-1} \cap \Gamma_1 = \emptyset$ ,  
450 and Lemma D.4 again. We also use  $|\Gamma_p| \geq 0.99m$  (Assumption 2). We further simplify this bound to  
451 conclude

$$\ell(t+1, \mathbf{x}_i) - \ell(t, \mathbf{x}_i) \leq 1.03\eta m[1 + (\gamma + \rho)(n - k)]$$

452 Additionally, we bound

$$\begin{aligned} \ell(1, \mathbf{x}_i) &= 1 - y_i f(1, \mathbf{x}_i) \\ &= 1 - \sum_{j=1}^{2m} (-1)^{i+j} \phi(\langle \mathbf{w}_j^{(1)}, \mathbf{x}_i \rangle) \\ &\geq 1 - \sum_{i \sim j} \phi(\langle \mathbf{w}_j^{(1)}, \mathbf{x}_i \rangle) \\ &\geq 1 - \sum_{i \sim j} [\phi(\langle \mathbf{w}_j^{(0)}, \mathbf{x}_i \rangle) + \eta T_{ij}(0, 1) + \eta(\gamma + \rho) G_j^{(i)}(0, 1)] \\ &\geq 1 - m[\lambda_w + \eta + 2\eta(\gamma + \rho)(n - k)]. \end{aligned}$$

453 Therefore as long as

$$t < \frac{1 - m[\lambda_w + \eta + 2\eta(\gamma + \rho)(n - k)]}{1.03\eta m[1 + (\gamma + \rho)(n - k)]} + 1 = \frac{1}{1.03\eta m[1 + (\gamma + \rho)(n - k)]} + O(1),$$

454 then

$$\begin{aligned} \ell(t, \mathbf{x}_i) &= \ell(1, \mathbf{x}_i) + \sum_{t'=1}^t \ell(t'+1, \mathbf{x}_i) - \ell(t', \mathbf{x}_i) \\ &\geq 1 - m[\lambda_w + \eta + 2\eta(\gamma + \rho)(n - k)] - 1.03(t-1)\eta m[1 + (\gamma + \rho)(n - k)] \\ &> 0. \end{aligned}$$

455 Notice that this does not depend on  $i$  or  $p$ . Therefore we can let  $\mathcal{T}_1$  be the largest integer satisfying  
 456 this bound for  $t$  and bound  $\ell(\mathcal{T}_1, \mathbf{x}_\ell) > 0$  for all  $\ell \in \mathcal{S}_T$ . To verify that  $\mathcal{T}_1 < \mathcal{T}_0$ , consider  $i \in \mathcal{S}_F$ :

$$\begin{aligned}
 y_i f(t, \mathbf{x}_i) &= \sum_{j=1}^{2m} -(-1)^{i+j} \phi(\langle \mathbf{w}_j^{(t)}, \mathbf{x}_i \rangle) \\
 &= \sum_{i \not\sim j} [(\phi(\langle \mathbf{w}_j^{(t)}, \mathbf{x}_i \rangle) - \phi(\langle \mathbf{w}_j^{(0)}, \mathbf{x}_i \rangle)) + \phi(\langle \mathbf{w}_j^{(0)}, \mathbf{x}_i \rangle)] \\
 &\leq \sum_{i \not\sim j} \left( T_{ij}(0, t) + (\gamma + \rho) B_j^{(i)}(0, t) + \lambda_w \right) \\
 &\leq \eta m t [1 + 2(\gamma + \rho)k] + m \lambda_w
 \end{aligned}$$

457 This is less than 1 for all  $t < \mathcal{T}_1$  since  $k \leq \frac{n}{3}$  (Assumption 2).

458 Now, fix  $i \in \mathcal{S}_T$  again. For  $i \sim j$ , we then can use Lemma C.2 and Lemma D.4:

$$\begin{aligned}
 \langle \mathbf{w}_j^{(\mathcal{T}_1)}, \mathbf{x}_i \rangle &\geq \langle \mathbf{w}_j^{(1)}, \mathbf{x}_i \rangle + \eta \left( T_{ij}(1, \mathcal{T}_1) + (\gamma - \rho) G_j^{(i)}(1, \mathcal{T}_1) - (\gamma + \rho) B_j^{(i)}(1, \mathcal{T}_1) \right) \\
 &\geq 0 + \eta (\mathcal{T}_1 - 2)(1 + (n - k - 1)(\gamma - \rho) - 2k(\gamma + \rho)) \\
 &= \frac{1 + (n - k - 1)(\gamma - \rho) - 2k(\gamma + \rho)}{1.03m[1 + (\gamma + \rho)(n - k)]} + O(\eta) \\
 &\geq \frac{1}{m} - \frac{2\rho(n - k) - 2k(\gamma + \rho) - (\gamma + \rho) - 2k(\gamma + \rho)}{m(1 + (\gamma + \rho)(n - k))} + O(\eta) \\
 &\geq \frac{1}{m} - \frac{1/6 + 4/99 + 1/100}{m} + O(\eta) \\
 &\geq \frac{3}{4m}.
 \end{aligned}$$

459 using  $\rho \leq \frac{1}{6(n-k)}$ ,  $\eta$  is sufficiently small, and  $\gamma + \rho < \min \left\{ \frac{1}{99k}, \frac{1}{100} \right\}$  (Assumption 2). Now assume  
 460  $i \not\sim j$ . Using Lemma C.2 and Lemma D.4 we can bound

$$\begin{aligned}
 \langle \mathbf{w}_j^{(\mathcal{T}_1)}, \mathbf{x}_i \rangle &\leq \langle \mathbf{w}_j^{(1)}, \mathbf{x}_i \rangle - \eta \left( T_{ij}(1, \mathcal{T}_1) + (\gamma - \rho) G_j^{(i)}(1, \mathcal{T}_1) - (\gamma + \rho) B_j^{(i)}(1, \mathcal{T}_1) \right) \\
 &\leq 0 - \eta (\mathcal{T}_1 - 2)((n - k)(\gamma - \rho) - 2k(\gamma + \rho)) \\
 &= -\frac{(n - k)(\gamma - \rho) - 2k(\gamma + \rho)}{1.03m[1 + (\gamma + \rho)(n - k)]} + O(\eta) \\
 &\leq -\frac{(n - 3k)\gamma - (n + k)\rho}{1.03m} + O(\eta) \\
 &\leq -\frac{0.97n\gamma - \frac{1.01}{5}n}{1.03m} + O(\eta) \\
 &\leq -\frac{3n\gamma}{4m}.
 \end{aligned}$$

461 using  $\eta$  is sufficiently small and  $k \leq \frac{n}{100}$  and  $\rho \leq \frac{\gamma}{5}$  (Assumption 2). Likewise, for  $1 \leq t < \mathcal{T}_1$ ,

$$\begin{aligned}
\ell(t, \mathbf{x}_i) - \ell(t+1, \mathbf{x}_i) &= y_i[f(t+1, \mathbf{x}_i) - f(t, \mathbf{x}_i)] \\
&= \sum_{j=1}^{2m} (-1)^{i+j} [\phi(\langle \mathbf{w}_j^{(t+1)}, \mathbf{x}_i \rangle) - \phi(\langle \mathbf{w}_j^{(t)}, \mathbf{x}_i \rangle)] \\
&= \sum_{j \notin \Gamma_{(-1)^{i+1}}} (-1)^{i+j} [\phi(\langle \mathbf{w}_j^{(t+1)}, \mathbf{x}_i \rangle) - \phi(\langle \mathbf{w}_j^{(t)}, \mathbf{x}_i \rangle)] \\
&= \eta \left( \sum_{j \in \Gamma_{(-1)^i}} [\langle \mathbf{w}_j^{(t+1)}, \mathbf{x}_i \rangle - \langle \mathbf{w}_j^{(t)}, \mathbf{x}_i \rangle] \right) \\
&\quad + \eta \left( \sum_{j \notin \Gamma} (-1)^{i+j} [\phi(\langle \mathbf{w}_j^{(t+1)}, \mathbf{x}_i \rangle) - \phi(\langle \mathbf{w}_j^{(t)}, \mathbf{x}_i \rangle)] \right) \\
&\geq \eta \left( \sum_{j \in \Gamma_{(-1)^i}} T_{ij}(t_0, t) + G_j^{(i)}(t_0, t)(\gamma - \rho) - B_j^{(i)}(t_0, t)(\gamma + \rho) \right) \\
&\quad + \eta \left( \sum_{j \notin \Gamma} T_{ij}(t, t+1) - (\gamma + \rho)B_j(t, t+1) \right) \\
&\geq 0.99\eta m[1 + (\gamma - \rho)(n - k - 1) - 2(\gamma + \rho)k] - 0.04\eta m(\gamma + \rho)k \\
&\geq 0.99\eta m[1 + (\gamma - \rho)(n - k - 1)] - 2.02\eta m(\gamma + \rho)k
\end{aligned}$$

462 In the first six lines we use:  $t < \mathcal{T}_0$ , the definition of  $f(t, \mathbf{x})$ , Lemma D.4, Lemma C.2 and Lemma C.3,  
463 Lemma D.4 again, and  $|\Gamma_p| \geq 0.99m$  (Assumption 2), respectively.

464 We also bound

$$\begin{aligned}
\ell(1, \mathbf{x}_i) &= 1 - y_i f(1, \mathbf{x}_i) \\
&= 1 - \sum_{j=1}^{2m} (-1)^{i+j} \phi(\langle \mathbf{w}_j^{(1)}, \mathbf{x}_i \rangle) \\
&\leq 1 + \sum_{i \not\sim j} \phi(\langle \mathbf{w}_j^{(1)}, \mathbf{x}_i \rangle) \\
&\leq 1 + \sum_{i \not\sim j} [\phi(\langle \mathbf{w}_j^{(0)}, \mathbf{x}_i \rangle) - \eta T_{ij}(0, 1) + \eta(\gamma + \rho)B_j(0, 1) + \eta] \\
&\leq 1 + m[\lambda_w + \eta + 2\eta(\gamma + \rho)k].
\end{aligned}$$

465 Combining these two bounds we see that

$$\begin{aligned}
\ell(\mathcal{T}_1, \mathbf{x}_i) &\leq \ell(1, \mathbf{x}_i) - \eta(\mathcal{T}_1 - 1)(0.99m(1 + (\gamma - \rho)(n - k - 1)) - 2.02m(\gamma + \rho)k) \\
&\leq 1 - \frac{0.99m[1 + (\gamma - \rho)(n - k - 1)] - 2.02m(\gamma + \rho)k}{1.03m(1 + (\gamma + \rho)(n - k))} + O(\eta) \\
&\leq \frac{0.99((\gamma + \rho) + 2\rho(n - k - 1)) + 0.08 + \frac{4.04}{99}}{1.03m(1 + (\gamma + \rho)(n - k))} + O(\eta) \\
&\leq \frac{0.99(\frac{1}{100} + \frac{1}{6} + 0.08 + \frac{4.04}{99})}{1.03} + O(\eta) \\
&\leq \frac{1}{3}.
\end{aligned}$$

466 at this iteration, as desired. Here we use  $(\gamma + \rho) \leq \min\left\{\frac{1}{99k}, \frac{1}{100}, \frac{1}{n-k}\right\}$ ,  $\eta$  is sufficiently small, and  
467  $\rho \leq \frac{1}{6(n-k)}$  (Assumption 2) □

#### 468 D.4 Late training

469 **Lemma D.8.** Suppose Assumption 2 holds. Fix  $\varepsilon > 0$ . We will say a neuron is aligned (at iteration  $t$ )  
470 if

$$(-1)^j \operatorname{sgn} \langle \mathbf{w}_j^{(t)}, \mathbf{x}_i \rangle = y_i$$

471 for all  $i \in \mathcal{S}_T$ . For  $t \geq \mathcal{T}_1$ , if

$$B(\mathcal{T}_1, t) \leq \frac{5\varepsilon n}{8\eta}$$

472 then at least  $(1 - \varepsilon)m$  neurons in each  $\Gamma_p$  will be aligned.

473 *Proof.* Let  $p \in \{-1, 1\}$  and  $t$  be such that  $\varepsilon m$  different neurons in  $\Gamma_p$  are unaligned at iteration  $t$ .  
474 For any neuron index  $j \in \Gamma_p$  and  $i \in \mathcal{S}_T$ , we can use Lemma C.2 to bound

$$\begin{aligned} (-1)^{i+j} \langle \mathbf{w}_j^{(t)}, \mathbf{x}_i \rangle &\geq (-1)^{i+j} \langle \mathbf{w}_j^{(\mathcal{T}_1)}, \mathbf{x}_i \rangle + \eta T_{ij}(\mathcal{T}_1, t) \\ &\quad + \eta(\gamma - \rho) G_j^{(i)}(\mathcal{T}_1, t) - \eta(\gamma + \rho) B_j^{(i)}(\mathcal{T}_1, t) \\ &= \min \left\{ \frac{3}{4m}, \frac{3n\gamma}{4m} \right\} - \eta(\gamma + \rho) B_j(\mathcal{T}_1, t) \\ &\geq \frac{3n\gamma}{4m} - \eta(\gamma + \rho) B_j(\mathcal{T}_1, t). \end{aligned}$$

475 Since  $n\gamma < 1$  (Assumption 2), we see that  $\min\{\frac{3}{4m}, \frac{3n\gamma}{4m}\} = \frac{3n\gamma}{4m}$ . If the lower bound above is  
476 positive then  $(-1)^j \operatorname{sgn} \langle \mathbf{w}_j^{(t)}, \mathbf{x}_i \rangle = y_i$ . Therefore, if a neuron  $j$  is unaligned then  $B_j(\mathcal{T}_1, t) \geq$   
477  $\frac{3n\gamma}{4\eta m(\gamma + \rho)} \geq \frac{5n}{8\eta m}$  (using  $\rho \leq \frac{\gamma}{5}$  from Assumption 2). If there are  $\varepsilon m$  unaligned neurons, then

$$B(\mathcal{T}_1, t) = \sum_{j=1}^{2m} B_j(\mathcal{T}_1, t) \geq \frac{5\varepsilon n}{8\eta}. \quad \square$$

478 Denote the first iteration after  $\mathcal{T}_1$  where more than  $\varepsilon m$  neurons in one of the  $\Gamma_p$  are unaligned as  $\mathcal{T}^\varepsilon$ .  
479 If no such iteration exists, let  $\mathcal{T}^\varepsilon = \infty$ . We will eventually show that indeed  $\mathcal{T}^\varepsilon = \infty$ , by showing  
480 that the training process reaches zero loss before such an iteration can happen.

481 **Lemma D.9.** Assume Assumption 2 holds and also  $\gamma + \rho < \frac{0.99(1-\varepsilon)}{4k}$ . There is an iteration  $\mathcal{T}_2 \geq \mathcal{T}_1$   
482 so that for all iterations  $t$  satisfying  $\mathcal{T}_2 \leq t < \mathcal{T}^\varepsilon$  and all  $i \in \mathcal{S}_T$ ,

$$\ell(t, \mathbf{x}_i) \leq 4\eta(\gamma + \rho)km.$$

483 Furthermore, we can choose  $\mathcal{T}_2$  so that

$$\mathcal{T}_2 - \mathcal{T}_1 \leq \frac{1}{3\eta m(0.99(1-\varepsilon) - 4k(\gamma + \rho))} + 1.$$

484 *Proof.* Fix  $i \in \mathcal{S}_T$  and  $t < \mathcal{T}^\varepsilon - 1$ . Suppose  $\ell(t, \mathbf{x}_i) > 0$ . Using Lemma C.3 and  $t < \mathcal{T}^\varepsilon$ ,

$$\begin{aligned} y_i f(t+1, \mathbf{x}_i) - y_i f(t, \mathbf{x}_i) &= \sum_{j=1}^{2m} (-1)^{i+j} (\phi(\langle \mathbf{w}_j^{(t+1)}, \mathbf{x}_i \rangle) - \phi(\langle \mathbf{w}_j^{(t)}, \mathbf{x}_i \rangle)) \\ &\geq \sum_{j=1}^{2m} \eta(T_{ij}(t, t+1) - (\gamma + \rho)B_j(t, t+1)) \\ &\geq \eta 0.99(1 - \varepsilon)m - 4\eta mk(\gamma + \rho). \end{aligned}$$

485 Therefore,

$$\ell(t+1, \mathbf{x}_i) \leq \min\{\ell(t, \mathbf{x}_i) - \eta m(0.99(1 - \varepsilon) - 4k), 0\}.$$

486 By Lemma D.7, the loss of each clean point at  $\mathcal{T}_1$  is at most  $\frac{1}{3}$ , so each clean point reaches zero loss  
487 in at most

$$\left\lceil \frac{1}{3\eta m(0.99(1 - \varepsilon) - 4k(\gamma + \rho))} \right\rceil$$

488 iterations.

489 Now suppose  $\ell(t, \mathbf{x}_i) = 0$ . We similarly argue

$$\begin{aligned} y_i f(t+1, \mathbf{x}_i) - y_i f(t, \mathbf{x}_i) &= \sum_{j=1}^{2m} (-1)^{i+j} (\phi(\langle \mathbf{w}_j^{(t+1)}, \mathbf{x}_i \rangle) - \phi(\langle \mathbf{w}_j^{(t)}, \mathbf{x}_i \rangle)) \\ &\geq \sum_{j=1}^{2m} \eta (T_{ij}(t, t+1) - B_j(t, t+1)) \\ &\geq -4\eta mk. \end{aligned}$$

490 This implies  $\ell(t+1, \mathbf{x}_i) \leq 4\eta mk$ . By induction, we see that if  $t < \mathcal{T}^\varepsilon$  and  $\ell(t, \mathbf{x}_i) \leq 4\eta mk$ , then  
 491  $\ell(t+1, \mathbf{x}_i) \leq 4\eta mk$ .  $\square$

492 **Lemma D.10.** Assume Assumption 2 holds and  $\gamma + \rho < \frac{0.99(1-\varepsilon)}{4k}$ . For all  $t_1, t_2$  satisfying  $\mathcal{T}_2 \leq$   
 493  $t_1 \leq t_2 < \mathcal{T}^\varepsilon$  and  $i \in \mathcal{S}_T$ ,

$$S_i(t_1, t_2) \leq \frac{4(t_2 - t_1)(\gamma + \rho)k + 4k + 3}{0.99(1 - \varepsilon)}.$$

494 *Proof.* Recall Lemma C.5 (restated in this setting, using Lemma D.9):

$$T_i(t_1, t_2) \leq \frac{4\eta mk}{\eta} + (\gamma + \rho)B(t_1, t_2) + 3m.$$

495 Using  $t < \mathcal{T}^\varepsilon$  we bound

$$\begin{aligned} 0.99(1 - \varepsilon)mS_i(t_1, t_2) &\leq T_i(t_1, t_2) \\ &\leq \frac{4\eta mk}{\eta} + (\gamma + \rho)B(t_1, t_2) + 3m \\ &\leq 4mk + 4(t_2 - t_1)(\gamma + \rho)mk + 3m. \end{aligned}$$

496 From this, the desired inequality follows.  $\square$

497 **Lemma D.11.** Assume Assumption 2 holds and  $\gamma + \rho \leq \min \left\{ \frac{0.99(1-\varepsilon)}{4k}, \sqrt{\frac{0.99(1-\varepsilon)}{8(n-k)k}} \right\}$ . Let  $i \in \mathcal{S}_F$ .  
 498 Suppose there is  $j \not\sim i$  such that

$$\langle \mathbf{w}_j^{(\mathcal{T}_2)}, \mathbf{x}_i \rangle > \eta \frac{2(n-k)(\gamma + \rho)(4k + 3)}{0.99(1 - \varepsilon)}.$$

499 Then for all  $t$  satisfying  $\mathcal{T}_2 \leq t < \mathcal{T}^\varepsilon$ ,  $\langle \mathbf{w}_{j'}^{(t)}, \mathbf{x}_i \rangle > 0$  for some neuron  $j'$  depending on  $t$ .

500 *Proof.* Let  $\tau_0 \geq \mathcal{T}_2$  be the first iteration after  $\mathcal{T}_2$  where  $\ell(t, \mathbf{x}_i) = 0$ . We will show by induction that  
 501 for all  $t$  satisfying  $\mathcal{T}_2 \leq t \leq \tau_0$  that  $\langle \mathbf{w}_j^{(t)}, \mathbf{x}_i \rangle > 0$ . The case  $t = \mathcal{T}_2$  follows immediately by the  
 502 assumption of the lemma. Otherwise, assume  $\langle \mathbf{w}_j^{(t')}, \mathbf{x}_i \rangle > 0$  for all  $\mathcal{T}_2 \leq t' < t$ . By Lemma C.2

503 and Lemma D.10,

$$\begin{aligned}
\langle \mathbf{w}_j^{(t+1)}, \mathbf{x}_i \rangle &\geq \langle \mathbf{w}_j^{(\mathcal{T}_2)}, \mathbf{x}_i \rangle \\
&\quad + \eta \left( T_{ij}(\mathcal{T}_2, t+1) - G_j^{(i)}(\mathcal{T}_2, t+1)(\gamma + \rho) + B_j^{(i)}(\mathcal{T}_2, t+1)(\gamma - \rho) \right) \\
&\geq \langle \mathbf{w}_j^{(\mathcal{T}_2)}, \mathbf{x}_i \rangle + \eta(t+1 - \mathcal{T}_2) - \eta(\gamma + \rho) \sum_{i \in \mathcal{S}_T} S_i(\mathcal{T}_2, t+1) \\
&\geq \langle \mathbf{w}_j^{(\mathcal{T}_2)}, \mathbf{x}_i \rangle + \eta(t+1 - \mathcal{T}_2) \\
&\quad - \eta 2(n-k)(\gamma + \rho) \left( \frac{4(t+1 - \mathcal{T}_2)(\gamma + \rho)k + 4k + 3}{0.99(1 - \varepsilon)} \right) \\
&= \eta(t+1 - \mathcal{T}_2) \left( 1 - \frac{8(n-k)k(\gamma + \rho)^2}{0.99(1 - \varepsilon)} \right) + \langle \mathbf{w}_j^{(\mathcal{T}_2)}, \mathbf{x}_i \rangle \\
&\quad - \eta \frac{2(n-k)(\gamma + \rho)(4k + 3)}{0.99(1 - \varepsilon)} \\
&> 0.
\end{aligned}$$

504 We now continue the induction past  $\tau_0$ . If  $\ell(t, \mathbf{x}_i) = 0$ , then point  $i$  clearly activates some neuron.  
505 Let  $\tau_1$  be the first iteration after  $\tau_0$  where  $\ell(t, \mathbf{x}_i) > 0$ . By Lemma C.3

$$\begin{aligned}
y_i f(\tau_1, \mathbf{x}_i) - y_i f(\tau_1 - 1, \mathbf{x}_i) &= \sum_{j'=1}^{2m} -(-1)^{i+j} (\phi(\langle \mathbf{w}_j^{(\tau_1)}, \mathbf{x}_i \rangle) - \phi(\langle \mathbf{w}_j^{(\tau_1-1)}, \mathbf{x}_i \rangle)) \\
&\geq \sum_{j=1}^{2m} \eta(T_{ij}(t, \tau_1) - G_j(t, \tau_1 - 1)) \\
&\geq -4\eta m(n-k).
\end{aligned}$$

506 This means

$$\sum_{j' \neq i} (-1)^j \phi(\langle \mathbf{w}_{j'}^{(\tau_1)}, \mathbf{x}_i \rangle) \geq y_i f(\tau_1, \mathbf{x}_i) \geq 1 - 4\eta m(n-k)$$

507 and there is some  $j'$  satisfying

$$\phi(\langle \mathbf{w}_{j'}^{(\tau_1)}, \mathbf{x}_i \rangle) \geq \frac{1}{m} - 4\eta(n-k) > \eta \frac{2(n-k)(\gamma + \rho)(4k + 3)}{0.99(1 - \varepsilon)},$$

508 assuming  $\eta$  is sufficiently small (Assumption 2). We can run the original induction argument with  
509  $\tau_1$  replacing  $\mathcal{T}_2$  and  $\tau_2 = \min\{t \geq \tau_2 : \ell(t, \mathbf{x}_i) = 0\}$  replacing  $\tau_0$  to verify the conclusion for  
510  $\tau_1 \leq t \leq \tau_2$ . By switching back and forth between these two arguments, we can show that point  $i$   
511 activates some neuron for all  $\mathcal{T}_2 \leq t < \mathcal{T}^\varepsilon$ .  $\square$

512 **Lemma D.12.** *If Assumption 2 holds, the training process reaches loss.*

513 *Proof.* In this proof, let  $\varepsilon = \frac{1}{5}$ . The conditions of Lemma D.9, Lemma D.10, and Lemma D.11 hold  
514 because  $\gamma + \rho \leq \min \left\{ \frac{0.99/5}{k}, \sqrt{\frac{0.99/5}{2k(n-k)}} \right\}$ .

515 By Lemma D.2, there is a finite bound on the number of updates, independent of the number of  
516 iterations spent training. If we carry out the training procedure for infinitely many iterations, there  
517 must be some iteration where we make no updates. Since the training procedure is deterministic, we  
518 will not make any updates after this point, and we will have converged. It remains to show that this  
519 convergence results in zero training loss. The only way for a point to not update any neurons is for  
520 that point's loss to be zero or for that point to activate no neurons.

521 Lemma D.8 and Lemma D.11 say, under certain conditions, that every clean point and every corrupted  
522 point activates some neuron for each iteration  $t \leq \mathcal{T}^\varepsilon$ . We need only to verify that these conditions  
523 hold and that  $B(\mathcal{T}_1, t)$  remains below the limitation set in Lemma D.8.

524 We apply Lemma D.2 starting at  $t_0 = \mathcal{T}_1$ . By Lemma D.7,  $\ell(\mathcal{T}_1, \mathbf{x}_i) \leq \frac{1}{3}$  for all  $i \in \mathcal{S}_T$ . Using  
 525 Lemma D.6, for  $i \in \mathcal{S}_F$ ,

$$\begin{aligned}\ell(\mathcal{T}_1, \mathbf{x}_i) &\leq 1 - y_i \sum_{j=1}^{2m} (-1)^j \phi(\langle \mathbf{w}_j^{(\mathcal{T}_1)}, \mathbf{x}_i \rangle) \\ &\leq 1 + \sum_{j \sim i}^{2m} \phi(\langle \mathbf{w}_j^{(\mathcal{T}_1)}, \mathbf{x}_i \rangle) \\ &\leq 1 + O(\eta).\end{aligned}$$

526 With these bounds, Lemma D.2 shows that for all  $t \geq \mathcal{T}_1$ ,

$$\begin{aligned}B(\mathcal{T}_1, t) &\leq \frac{2k}{1 - 4k(n-k)(\gamma + \rho)^2} \left( \frac{1}{\eta} + 2(n-k)(\gamma + \rho) \frac{1}{3\eta} \right) + O(1) \\ &\leq \frac{2k(1 + (2/3)(n-k)(\gamma + \rho))}{\eta(1 - 4k(n-k)(\gamma + \rho)^2)} + O(1) \\ &\leq \frac{2k(5/3)}{\eta(1 - 4/99)} + O(1) \\ &\leq \frac{n}{10\eta}\end{aligned}$$

527 using  $\gamma + \rho \leq \min\{\frac{1}{n-k}, \frac{1}{99k}\}$ ,  $\eta$  sufficiently small, and  $k \leq \frac{n}{100}$  (Assumption 2). By Lemma D.8,  
 528  $\mathcal{T}^\varepsilon = \infty$  if  $\frac{n}{10\eta} < \frac{5\varepsilon n}{8\eta}$ , which is clearly true for  $\varepsilon = \frac{1}{5}$ .

529 We now show that every training point  $i$  activates at least one neuron each iteration. By Lemma D.9,  
 530 this is true if  $i \in \mathcal{S}_T$ . By Lemma D.11, this is true for  $i \in \mathcal{S}_F$  if there is a neuron  $j \not\sim i$  such that  
 531  $\langle \mathbf{w}_j^{(\mathcal{T}_2)}, \mathbf{x}_i \rangle > \eta \frac{2(n-k)(\gamma + \rho)(4k+3)}{0.99(1-\varepsilon)}$ . Fix  $i \in \mathcal{S}_F$ .

532 First, assume that  $\ell(t, \mathbf{x}_i) > 0$  for all  $t < \mathcal{T}_2$ . By Assumption 2 and Lemma D.3, we know there is  
 533  $j \in \Gamma_{y_i}$  such that  $i \in \mathcal{A}_j^{(1)}$ . Using Lemma C.2 and Lemma D.4 we can bound

$$\begin{aligned}\langle \mathbf{w}_j^{(\mathcal{T}_1)}, \mathbf{x}_i \rangle &\geq \langle \mathbf{w}_j^{(1)}, \mathbf{x}_i \rangle + \eta T_{ij}(1, \mathcal{T}_1) - \eta(\gamma + \rho)G_j^{(i)}(1, \mathcal{T}_1) + \eta(\gamma - \rho)B_j^{(i)}(1, \mathcal{T}_1) \\ &\geq \eta(1 - (\gamma + \rho)(n-k))(\mathcal{T}_1 - 1)\end{aligned}$$

534 and

$$\langle \mathbf{w}_j^{(\mathcal{T}_2)}, \mathbf{x}_i \rangle \geq \langle \mathbf{w}_j^{(\mathcal{T}_1)}, \mathbf{x}_i \rangle + \eta T_{ij}(\mathcal{T}_1, \mathcal{T}_2) - \eta(\gamma + \rho)G_j^{(i)}(\mathcal{T}_1, \mathcal{T}_2) + \eta(\gamma - \rho)B_j^{(i)}(\mathcal{T}_1, \mathcal{T}_2).$$

535 By induction on  $t$  we see that

$$G_j(\mathcal{T}_1, t) \leq \max_{\mathcal{T}_1 \leq t' < t} \left( (n-k)(t+1-t') + \frac{(\gamma + \rho)B_j(\mathcal{T}_1, t')}{\gamma - \rho} \right)$$

536 for  $t > \mathcal{T}_1$ . The base case  $t = \mathcal{T}_1 + 1$  is clear. Suppose the inequality holds for  $t$ . Either  $G_j(\mathcal{T}_1, t)$   
 537 increases by at most  $n-k$  or there is some  $i' \in \mathcal{S}_T \cap \mathcal{A}_j^{(t+1)}$  with  $i' \not\sim j$ . By Lemma C.2 and  
 538 Lemma D.7,

$$\begin{aligned}0 < \langle \mathbf{w}_j^{(t)}, \mathbf{x}_{i'} \rangle &\leq \langle \mathbf{w}_j^{(\mathcal{T}_1)}, \mathbf{x}_{i'} \rangle - \eta(\gamma - \rho)G_j(\mathcal{T}_1, t+1) + \eta(\gamma + \rho)B_j(\mathcal{T}_1, t) \\ &\leq -\eta(\gamma - \rho)G_j(\mathcal{T}_1, t) + \eta(\gamma + \rho)B_j(\mathcal{T}_1, t)\end{aligned}$$

539 from which the inequality follows. Since  $\frac{(\gamma + \rho)B_j(\mathcal{T}_1, t')}{\gamma - \rho} \leq 3k(t' - \mathcal{T}_1) < (n-k)(t' - \mathcal{T}_1)$  (using  
 540  $\rho < \frac{\gamma}{5}$  and  $k \leq \frac{n}{100}$  from Assumption 2), this maximum occurs at  $\tau = \mathcal{T}_1$ . This yields

$$\begin{aligned}\langle \mathbf{w}_j^{(\mathcal{T}_2)}, \mathbf{x}_i \rangle &\geq \eta(1 - (\gamma + \rho)(n-k))(\mathcal{T}_2 + 1 - 1)\eta(\gamma - \rho)B_j^{(i)}(\mathcal{T}_1, \mathcal{T}_2) \\ &\geq \eta(1 - (\gamma + \rho)(n-k))\mathcal{T}_2\end{aligned}$$

541 We want to show this bound is larger than a quantity that is  $O(\eta)$ . This happens when both of the  
 542 following hold:

$$O(1) \leq (1 - (\gamma + \rho)(n-k))\mathcal{T}_2,$$

543 which holds when  $\eta$  is sufficiently small.

544 Now suppose  $\ell(\tau, \mathbf{x}_i) = 0$  for some iteration  $\tau \leq \mathcal{T}_2$ . By Lemma D.7,  $\mathcal{T}_1 < \tau$ . In this case, we see  
 545 that

$$\begin{aligned} y_i f(\mathcal{T}_2, \mathbf{x}_i) &= y_i f(\mathcal{T}_2, \mathbf{x}_i) + \sum_{j=1}^{2m} -(-1)^{i+j} [\phi(\langle \mathbf{w}_j^{(\mathcal{T}_1)}, \mathbf{x}_i \rangle) - \phi(\langle \mathbf{w}_j^{(\tau)}, \mathbf{x}_i \rangle)] \\ &\geq 1 - \eta(\gamma + \rho) G(\tau, \mathcal{T}_2) \\ &\geq 1 - (\gamma + \rho) \frac{2(n-k)}{1 - 4k(n-k)(\gamma + \rho)^2} \left[ \frac{1}{3} + 2k(\gamma + \rho) \right] + O(\eta) \\ &\geq 1 - \frac{2}{1 - 4/99} \left( \frac{1}{3} + \frac{2}{99} \right) + O(\eta) \geq \frac{1}{4} \end{aligned}$$

546 where in the third line we use Lemma D.2 and the fourth line we use  $\gamma + \rho \leq \min\{\frac{1}{n-k}, \frac{1}{99k}\}$  and  $\eta$   
 547 sufficiently small (Assumption 2). Since this is positive, there is some neuron  $j$  with  $i \not\sim j$  such that  
 548  $\phi(\langle \mathbf{w}_j^{(\mathcal{T}_2)}, \mathbf{x}_i \rangle)$  is at least  $\frac{1}{m}$  this bound. This is an  $\Omega(1)$  lower bound. Since the required condition is  
 549  $\langle \mathbf{w}_j^{(\mathcal{T}_2)}, \mathbf{x}_i \rangle > O(\eta)$ , this can be achieved by taking  $\eta$  sufficiently small.  $\square$

## 550 D.5 Proof of Lemma 3.5

551 **Lemma D.13** (Lemma 3.5). *Assume Assumption 2 holds. Let  $y \in \{-1, 1\}$  chosen uniformly and  
 552  $\mathbf{x} := (y\sqrt{\gamma}\mathbf{v}, \sqrt{1-\gamma}\mathbf{n})$ , where  $\mathbf{n} \sim \text{Uniform}(\mathcal{S}^{d-1} \cap \text{span}\{\mathbf{v}\}^\perp)$ . Suppose that  $|\langle \mathbf{n}, \mathbf{n}_\ell \rangle| < \frac{\rho}{1-\gamma}$   
 553 for all  $\ell \in [2n]$ , then  $y f(\mathcal{T}_{\text{end}}, \mathbf{x}) > 0$ .*

554 *Proof.* Following the same steps as in (5) for any  $j \in [2m]$

$$\begin{aligned} \langle \mathbf{w}_j^{(\mathcal{T}_{\text{end}})}, \mathbf{x} \rangle &= \langle \mathbf{w}_j^{(1)}, \mathbf{x}_i \rangle + (-1)^j \eta \sum_{\ell=1}^{2n} T_{\ell j}(1, \mathcal{T}_{\text{end}}) y_\ell \langle \mathbf{x}_\ell, \mathbf{x}_i \rangle \\ &= \langle \mathbf{w}_j^{(t_0)}, \mathbf{x}_i \rangle + (-1)^j y \eta \sum_{\ell=1}^{2n} T_{\ell j}(t_0, t) (-1)^\ell y \beta(\ell) \langle \mathbf{x}_\ell, \mathbf{x} \rangle \\ &= \langle \mathbf{w}_j^{(t_0)}, \mathbf{x}_i \rangle + (-1)^j y \eta \sum_{\ell=1}^{2n} T_{\ell j}(t_0, t) \lambda'_{i\ell}, \end{aligned}$$

555 where  $\lambda'_\ell := (-1)^l y \beta(\ell) \langle \mathbf{x}_\ell, \mathbf{x} \rangle = \beta(\ell) \gamma + (1-\gamma) \langle \mathbf{n}_\ell, \mathbf{n} \rangle$ . Then as in Lemma C.1

$$\begin{aligned} \gamma - \rho &\leq \lambda'_\ell \leq \gamma + \rho, \text{ if } i \in \mathcal{S}_T, \\ -(\gamma + \rho) &\leq \lambda'_\ell \leq -(\gamma - \rho), \text{ if } i \in \mathcal{S}_F. \end{aligned}$$

556 Recall, from Lemma D.4 for any  $j \in \Gamma_p$  then  $G_j(1, \mathcal{T}_{\text{end}}) \geq G_j(1, \mathcal{T}_1) = \mathcal{T}_1(n-k)$ . As a  
 557 consequence, for  $j \in \Gamma_p$  we have

$$\begin{aligned} \langle \mathbf{w}_j^{(\mathcal{T}_{\text{end}})}, \mathbf{x} \rangle &\geq \langle \mathbf{w}_j^{(1)}, \mathbf{x}_i \rangle + \eta G_j(1, \mathcal{T}_{\text{end}})(\gamma - \rho) - \eta B_j(1, \mathcal{T}_{\text{end}})(\gamma + \rho) \\ &\geq O(\eta) + \mathcal{T}_1(n-k)(\gamma - \rho) - \eta B_j(1, \mathcal{T}_{\text{end}})(\gamma + \rho). \end{aligned}$$

558 For  $j$  such that  $(-1)^j = y$  then

$$\begin{aligned} \phi(\langle \mathbf{w}_j^{(\mathcal{T}_{\text{end}})}, \mathbf{x} \rangle) &\leq \phi(\langle \mathbf{w}_j^{(1)}, \mathbf{x}_i \rangle - \eta G_j(1, \mathcal{T}_{\text{end}})(\gamma - \rho) + \eta B_j(1, \mathcal{T}_{\text{end}})(\gamma + \rho)) \\ &\leq O(\eta) + \eta B_j(1, \mathcal{T}_{\text{end}})(\gamma + \rho). \end{aligned}$$

559 As a result

$$\begin{aligned}
yf(\mathcal{T}_{\text{end}}, \mathbf{x}) &= \sum_{j \in [2m]} \phi(\langle \mathbf{w}_j^{(\mathcal{T}_{\text{end}})}, \mathbf{x} \rangle) \\
&\geq \sum_{j \in \Gamma_p} \langle \mathbf{w}_j^{(\mathcal{T}_{\text{end}})}, \mathbf{x} \rangle - \sum_{j : (-1)^j \neq y} \phi(\langle \mathbf{w}_j^{(\mathcal{T}_{\text{end}})}, \mathbf{x} \rangle) \\
&\geq \eta \sum_{j \in \Gamma_p} \mathcal{T}_1(n-k)(\gamma - \rho) - \eta \sum_{j \in [2n]} B_j(1, \mathcal{T}_{\text{end}})(\gamma + \rho) + O(\eta) \\
&\geq 0.99\eta m \mathcal{T}_1(n-k) - \eta B(1, \mathcal{T}_{\text{end}})(\gamma + \rho) + O(\eta)
\end{aligned}$$

560 using  $|\Gamma_p| \geq 0.99$  (Assumption 2). From Lemma D.7

$$\mathcal{T}_1 = \frac{1}{1.03\eta m[1 + (\gamma + \rho)(n-k)]} + O(1),$$

561 furthermore, combining the assumptions  $100k < n$ ,  $\eta$  sufficiently small, and  $\gamma + \rho < \frac{1}{n-k}$  with  
562 Lemma D.2 we see

$$\begin{aligned}
B(1, \mathcal{T}_{\text{end}}) &\leq \frac{2k}{1 - 4k(n-k)(\gamma + \rho)^2} \left[ \frac{1}{\eta} + 2(n-k)(\gamma + \rho) \left( \frac{1}{\eta} \right) \right] + O(n) \\
&\leq \frac{n}{10\eta}.
\end{aligned}$$

563 Here we also use that  $\ell(0, \mathbf{x}_i) \leq 1 + m\lambda_w = 1 + O(\eta)$  for all  $i$ .

564 Combining these inequalities it follows that

$$\begin{aligned}
yf(\mathcal{T}_{\text{end}}, \mathbf{x}) &\geq \frac{0.99}{1.03} \cdot \frac{n-k}{2}(\gamma - \rho) - \frac{n}{10}(\gamma + \rho) + O(\eta) \\
&\geq \frac{n}{3} - \frac{3n}{25} + O(\eta) > 0,
\end{aligned}$$

565 again using  $100k < n$ ,  $\eta$  sufficiently small, and  $\gamma + \rho < \frac{1}{n-k}$ . □

## 566 D.6 Proof of Theorem 3.1

567 **Theorem D.14** (Theorem 3.1). *Let Assumption 1 hold. With probability at least  $1 - \delta$  over the*  
568 *randomness of the dataset and network initialization the following hold.*

- 569 1. *The training process terminates at an iteration  $\mathcal{T}_{\text{end}} \leq \frac{Cn}{\eta}$ .*
- 570 2. *For all  $i \in [2n]$   $\ell(\mathcal{T}_{\text{end}}, \mathbf{x}_i) = 0$ .*
- 571 3. *The generalization error satisfies*

$$\mathbb{P}(\text{sgn}(f(\mathcal{T}_{\text{end}}, \mathbf{x})) \neq y) \leq C \exp\left(-\frac{d\gamma^2}{32}\right).$$

572 *Proof.* Under Assumption 2 Statement 1 and 2 are derived from Lemma D.12. The bound in statement  
573 1 comes from Lemma D.2 applied from iteration 0 to iteration  $\mathcal{T}_{\text{end}}$ , using  $4k(n-k)(\gamma + \rho)^2 < 4/99$   
574 and  $\ell(0, \mathbf{x}_i) = 1 + O(\eta)$  for all  $i \in [2n]$ . Statement 3 comes from Lemma D.13. Finally, under  
575 Assumption 1 then by Lemma D.1 Assumption 2 holds probability at least  $1 - \delta$ . □

## 576 E Non-benign overfitting

577 **Assumption 3.** *Let  $\delta \in (0, 1)$ . For the non-benign overfitting setting we assume the following*  
578 *conditions on the data and model hyperparameters.*

- 579 1.  $\gamma \leq \frac{1}{6\sqrt{dn}}$

- 580 2.  $\eta \leq \frac{1}{2mn}$ ,  
 581 3.  $\lambda_w \leq \min\{n\gamma/10, \eta/4\}$ ,  
 582 4.  $m \geq \log_2(\frac{4n}{\delta})$   
 583 5.  $d \geq \max\left\{6, 3\rho^{-2} \ln\left(\frac{4n^2}{\delta}\right)\right\}$  where  $\rho \leq \min\{\frac{1-\gamma}{4n}, \frac{1}{3n} - \gamma\}$ .

584 For convenience, in our analysis we will make two additional assumptions.

585 **Assumption 4.** *In addition to the conditions detailed in Assumption 4, assume the following two*  
 586 *conditions hold.*

- 587 1. *For all  $i \in [2n]$  there exists a  $j \in [2m]$  such that  $(-1)^j = y_i$  and  $i \in \mathcal{A}_j^{(0)}$ .*  
 588 2. *For all  $i, l \in [2n]$ ,  $i \neq l$   $|\langle \mathbf{n}_i, \mathbf{n}_l \rangle| \leq \frac{\rho}{1-\gamma}$ .*

589 As demonstrated in the following Lemma, these additional two conditions hold with high probability  
 590 over the randomness of the initialization and training set.

591 **Lemma E.1.** *The additional conditions of Assumption 4 hold with probability at least  $1 - \delta$ .*

592 *Proof.* The additional conditions of Assumption 4 over Assumption 3 are as follows.

- 593 1. For all  $i \in [2n]$  there exists a  $j \in [2m]$  such that  $(-1)^j = y_i$  and  $i \in \mathcal{A}_j^{(0)}$ .  
 594 2. For all  $i, l \in [2n]$ ,  $i \neq l$   $|\langle \mathbf{n}_i, \mathbf{n}_l \rangle| \leq \frac{\rho}{1-\gamma}$ .

595 Using Lemma B.5, then as long as  $m \geq \log_2(\frac{4n}{\delta})$  the probability the first condition does not hold is  
 596 at most  $\delta/2$ . Using Lemma B.1, and observing  $\frac{\rho}{1-\gamma} > \rho$ , then as long as

$$d \geq \max\left\{6, 3\rho^{-2} \ln\left(\frac{4n^2}{\delta}\right)\right\}$$

597 the probability that the second condition does not hold is also at most  $\delta/2$ . Using the union bound we  
 598 conclude that both properties hold with probability at least  $\delta$ .  $\square$

## 599 E.1 Proof of Lemma 3.7

600 **Lemma E.2** (Lemma 3.7). *Assume Assumption 4 and that  $\ell(t_0, \mathbf{x}_i) \leq a$  for all  $i$ . Then*

$$T(t_0, t) \leq \frac{2n}{1 - (2n-1)(\gamma + \rho)} \left( \frac{a}{\eta} + 3m \right).$$

601 *Proof.* From Lemma C.5,  $\phi(\rho - \gamma) \leq \rho + \gamma$ , and the assumption on  $a$ ,

$$T_i(t_0, t) \leq \frac{a}{\eta} + 3m + (\gamma + \rho)T^{(i)}(t_0, t).$$

602 If we sum over  $i$ , we get

$$T(t_0, t) \leq \frac{2na}{\eta} + 6mn + (2n-1)(\gamma + \rho)T(t_0, t),$$

603 from which the result follows.  $\square$

## 604 E.2 Additional lemmas

605 **Lemma E.3.** *If Assumption 4 holds, then the training process converges to zero loss.*

606 *Proof.* By Lemma E.2, there is an upper bound on the number of updates independent of epoch. This  
 607 can only happen if there is some epoch after which we make no updates. In turn, this can only happen  
 608 if every point is either at zero loss or activates no neurons. We prove by induction that every point  
 609 activates a neuron each epoch  $t = 0$ . Fix a point  $i$ .

610 At  $t = 0$  this is true by initialization. Now suppose it is true at epoch  $t$ . There are two cases to  
 611 consider to show this for epoch  $t + 1$ :

612 1. If  $\ell(t, \mathbf{x}_i) > 0$ , then let  $j$  be such that  $\phi(\langle \mathbf{w}_j^{(t)}, \mathbf{x}_i \rangle) > 0$ . We can bound

$$\begin{aligned} \phi(\langle \mathbf{w}_j^{(t+1)}, \mathbf{x}_i \rangle) &\geq \phi(\langle \mathbf{w}_j^{(t)}, \mathbf{x}_i \rangle) + \eta - \eta(\gamma + \rho)H_j^{(i)}(t, t+1) \\ &\geq \phi(\langle \mathbf{w}_j^{(t)}, \mathbf{x}_i \rangle) + \eta[1 - (\gamma + \rho)(2n - 1)] \\ &> 0, \end{aligned}$$

613 since  $\gamma + \rho < \frac{1}{2n-1}$  (Assumption 4).

614 2. If  $\ell(t, \mathbf{x}_i) = 0$ , then

$$\begin{aligned} y_i f(t, \mathbf{x}_i) &= y_i \sum_{j=1}^{2m} (-1)^j \phi(\langle \mathbf{w}_j^{(t)}, \mathbf{x}_i \rangle) \\ &\leq \sum_{j: (-1)^j = y_i} \phi(\langle \mathbf{w}_j^{(t)}, \mathbf{x}_i \rangle) \end{aligned}$$

615 is bounded below by 1. This means that there is some  $j$  such that  $\phi(\langle \mathbf{w}_j^{(t)}, \mathbf{x}_i \rangle) \geq \frac{1}{m}$ . We  
 616 bound

$$\begin{aligned} \phi(\langle \mathbf{w}_j^{(t+1)}, \mathbf{x}_i \rangle) &\geq \phi(\langle \mathbf{w}_j^{(t)}, \mathbf{x}_i \rangle) - \eta(\gamma + \rho)H_j^{(i)}(t, t+1) \\ &\geq \frac{1}{m} - \eta(\gamma + \rho)(2n - 1) \\ &> 0 \end{aligned}$$

617 since  $\eta < \frac{1}{2mn}$  (Assumption 4). □

618 **Lemma E.4.** Suppose that at epoch  $\tau$  every point is at zero loss. Then we can bound

$$\eta T(0, \tau) \geq n + O(\eta).$$

619 *Proof.* If  $\ell(\tau, \mathbf{x}_i) = 0$  for all  $i$ , then  $y_i f(\tau, \mathbf{x}_i) \geq 1$  for all  $i$  as well. We bound

$$\begin{aligned} y_i f(\tau, \mathbf{x}_i) &\leq \sum_{j: (-1)^j = y_i} (\phi(\langle \mathbf{w}_j^{(\tau)}, \mathbf{x}_i \rangle) - \phi(\langle \mathbf{w}_j^{(0)}, \mathbf{x}_i \rangle)) + O(\eta) \\ &\leq \sum_{j: (-1)^j = y_i} \eta[T_{ij}(0, \tau) + (\gamma + \rho)H_j^{(i)}(0, \tau)] + O(\eta) \\ &\leq \eta T_i(0, \tau) + \eta(\gamma + \rho)T^{(i)}(0, \tau) + O(\eta). \end{aligned}$$

620 If we sum over  $i$ , we see that

$$2n \leq \eta[1 + (2n - 1)(\gamma + \rho)]T(0, \tau) \leq 2\eta T(0, \tau) + O(\eta),$$

621 from which the desired result follows. □

622 **Lemma E.5.** Let  $y \in \{-1, 1\}$  chosen uniformly and  $\mathbf{x} := (y\sqrt{\gamma}\mathbf{v}, \sqrt{1-\gamma}\mathbf{n})$ , where  $\mathbf{n} \sim$   
 623  $\text{Uniform}(\mathcal{S}^{d-1} \cap \text{span}\{\mathbf{v}\}^\perp)$ . If Assumption 4 holds, then

$$\mathbb{P}(yf(\mathcal{T}_{\text{end}}, \mathbf{x}) < 0) \geq \frac{1}{8}$$

624 *Proof.* Let  $y \sim U(\{-1, 1\})$  and consider a clean test point  $\mathbf{x} = y(\sqrt{\gamma}\mathbf{v} + \sqrt{1-\gamma}\mathbf{n})$ , where  
 625  $\mathbf{n} \sim U(\mathbb{S}^d \setminus \text{span } \mathbf{v})$ . Observe by symmetry of the distributions of both  $y$  and  $\mathbf{n}$  that  $-\mathbf{x}$  is identically  
 626 distributed to  $\mathbf{x}$  and furthermore that the labels of  $\mathbf{x}$  and  $-\mathbf{x}$  are opposite. As a result, if  $y(f(\mathcal{T}_{\text{end}}, \mathbf{x}) -$   
 627  $f(\mathcal{T}_{\text{end}}, -\mathbf{x})) < 0$  then at least one of  $y(f(\mathcal{T}_{\text{end}}, \mathbf{x}) < 0$  or  $-y(f(\mathcal{T}_{\text{end}}, -\mathbf{x}) < 0$ , in turn implying at  
 628 least one of them is misclassified. By construction,  $\langle \mathbf{w}_j^{(t)}, \mathbf{x} \rangle > 0$  iff  $\langle \mathbf{w}_j^{(t)}, -\mathbf{x} \rangle < 0$ , therefore

$$\begin{aligned} y(f(\mathcal{T}_{\text{end}}, \mathbf{x}) - f(\mathcal{T}_{\text{end}}, -\mathbf{x})) &= y \sum_{j=1}^{2m} (-1)^j \left( \phi(\langle \mathbf{w}_j^{(\mathcal{T}_{\text{end}})}, \mathbf{x} \rangle) - \phi(\langle \mathbf{w}_j^{(\mathcal{T}_{\text{end}})}, -\mathbf{x} \rangle) \right) \\ &= \sum_{j=1}^{2m} y(-1)^j \langle \mathbf{w}_j^{(\mathcal{T}_{\text{end}})}, \mathbf{x} \rangle. \end{aligned}$$

629 Unwinding the GD update to a neuron we have

$$\mathbf{w}_j^{(\mathcal{T}_{\text{end}})} = \mathbf{w}_j^{(0)} + \eta \sum_{i=1}^{2n} T_{ij}(0, \mathcal{T}_{\text{end}}) (-1)^{i+j} \mathbf{x}_i.$$

630 Furthermore, as

$$\langle \mathbf{x}_i, \mathbf{x} \rangle = y(-1)^i (\gamma + (1-\gamma)\beta(i) \langle \mathbf{n}_i, \mathbf{n} \rangle)$$

631 then

$$\begin{aligned} \sum_{j=1}^{2m} y(-1)^j \langle \mathbf{w}_j^{(\mathcal{T}_{\text{end}})}, \mathbf{x} \rangle &= \sum_{j=1}^{2m} y(-1)^j \langle \mathbf{w}_j^{(0)}, \mathbf{x} \rangle + \eta \sum_{j=1}^{2m} \sum_{i=1}^{2n} y(-1)^j T_{ij}(0, \mathcal{T}_{\text{end}}) (-1)^{i+j} \langle \mathbf{x}_i, \mathbf{x} \rangle \\ &\leq 2m\lambda_w + \eta \sum_{i=1}^{2n} T_i(0, \mathcal{T}_{\text{end}}) (\gamma + (1-\gamma)\beta(i) \langle \mathbf{n}_i, \mathbf{n} \rangle) \\ &= 2m\lambda_w + \eta \left( T(0, \mathcal{T}_{\text{end}}) \gamma + \left\langle \mathbf{n}, (1-\gamma) \sum_{i=1}^{2n} T_i(0, \mathcal{T}_{\text{end}}) \beta(i) \mathbf{n}_i \right\rangle \right) \\ &\stackrel{d}{=} 2m\lambda_w + \eta (T(0, \mathcal{T}_{\text{end}}) \gamma - \|\mathbf{z}\| (1-\gamma) \langle \mathbf{n}, \mathbf{u} \rangle), \end{aligned}$$

632 where the final equality follows from symmetry of the noise distribution,  $\mathbf{z} := \sum_{i=1}^{2n} T_i(0, \mathcal{T}_{\text{end}}) \mathbf{n}_i$   
 633 and  $\mathbf{u} = \frac{\mathbf{z}}{\|\mathbf{z}\|}$ . Observe

$$\begin{aligned} \|\mathbf{z}\|^2 &= \sum_{i,l=1}^{2n} T_i(0, \mathcal{T}_{\text{end}}) T_l(0, \mathcal{T}_{\text{end}}) \langle \mathbf{n}_i, \mathbf{n}_l \rangle \\ &\geq \sum_i^{2n} T_i^2(0, \mathcal{T}_{\text{end}}) - \frac{\rho}{1-\gamma} \sum_{i \neq \ell}^{2n} T_i(0, \mathcal{T}_{\text{end}}) T_\ell(0, \mathcal{T}_{\text{end}}) \\ &= \frac{1-\gamma+\rho}{1-\gamma} \sum_i^{2n} T_i^2(0, \mathcal{T}_{\text{end}}) - \frac{\rho}{1-\gamma} T^2(0, \mathcal{T}_{\text{end}}) \\ &\geq \left( \frac{1}{2n} - \frac{\rho}{1-\gamma} \right) T^2(0, \mathcal{T}_{\text{end}}). \end{aligned}$$

634 where the final inequality follows from Jensen's inequality. By assumption  $4n\rho < 1-\gamma$ , and  
 635  $10m\lambda_w \leq n\gamma \leq \frac{\sqrt{n}}{6\sqrt{d}}$ , furthermore trivially  $(1-\gamma) > 0.8$ . Conditioning on the event  $\langle \mathbf{n}, \mathbf{u} \rangle > 0$ ,  
 636 which holds with probability 1/2, these inequalities in combination with Lemma E.4 give

$$\begin{aligned} \sum_{j=1}^{2m} y(-1)^j \langle \mathbf{w}_j^{(\mathcal{T}_{\text{end}})}, \mathbf{x} \rangle &\leq 2m\lambda_w + n\gamma - \frac{\sqrt{n}}{2} (1-\gamma) \langle \mathbf{n}, \mathbf{u} \rangle \\ &\leq \frac{1}{5} \sqrt{\frac{n}{d}} - \frac{4}{10} \sqrt{n} \langle \mathbf{n}, \mathbf{u} \rangle. \end{aligned}$$

Therefore, if  $\langle \mathbf{n}, \mathbf{u} \rangle > 0$  then the condition

$$\langle \sqrt{d}\mathbf{n}, \mathbf{u} \rangle \geq \frac{1}{2} \quad (8)$$

implies at least one of  $\mathbf{x}$  or  $-\mathbf{x}$  is misclassified. Suppose  $\mathbf{n} \sim U(\mathbb{S}^d \cap \text{span}(\mathbf{v})^\perp)$  is such that (8) holds. Then as  $y \sim U(\{-1, 1\})$  it follows given  $\mathbf{n}$  then either  $\mathbf{x}$  or  $-\mathbf{x}$  are sampled with equal probability and thus the chance of misclassifying is at least  $1/2$ . As a result the probability of misclassification is at least

$$\frac{1}{4} \mathbb{P} \left( \langle \sqrt{d}\mathbf{n}, \mathbf{u} \rangle \geq \frac{1}{2} \right) \geq \frac{1}{8}$$

as claimed.  $\square$

### E.3 Proof of Theorem 3.6

**Theorem E.6** (Theorem 3.6). *Assume Assumption 3 holds. With probability at least  $1 - \delta$  over the randomness of the dataset and network initialization the following hold.*

1. The training process terminates at an iteration  $\mathcal{T}_{\text{end}} \leq \frac{Cn}{\eta}$ .
2. For all  $i \in [2n]$   $\ell(\mathcal{T}_{\text{end}}, \mathbf{x}_i) = 0$ .
3. The generalization error satisfies

$$\mathbb{P}(\text{sgn}(f(\mathcal{T}_{\text{end}}, \mathbf{x})) \neq y) \geq \frac{1}{8}.$$

*Proof.* Under Assumption 4 Statement 1 and 2 come from Lemma E.3. The bound on  $\mathcal{T}_{\text{end}}$  comes from Lemma E.2 applied between epoches 0 and  $\mathcal{T}_{\text{end}}$ , using  $\ell(0, \mathbf{x}_i) = 1 + O(\eta)$  for all  $i \in [2n]$  and  $(\gamma + \rho)(2n - 1) < \frac{2}{3}$ . Statement 3 comes from Lemma E.5. We conclude by observing under Assumption 3 that Assumption 4 holds with probability at least  $1 - \delta$ .  $\square$

## F Non-overfitting

**Assumption 5.** *Let  $\delta \in (0, 1)$ . With  $n \geq C$  and  $\eta \leq c$  then for no overfitting we assume the following conditions on the data and model hyperparameters.*

1.  $k < \frac{n}{100}$ ,
2.  $\frac{3}{n} < \gamma < \frac{1}{36} \min\{k^{-1}, 1\}$ ,
3.  $\lambda_w \leq \frac{\eta\gamma}{4}$
4.  $m \geq C \ln \left( \frac{2n}{\delta} \right)$ ,
5.  $d \geq 3\rho^{-2} \ln \left( \frac{4n^2}{\delta} \right)$  where  $\rho \leq \frac{\gamma}{2}$ .

We remark that under these assumptions  $\rho$  as given above satisfies the inequality  $\rho < \min \left\{ \frac{\gamma(n-3k)-2}{n+k}, \frac{\gamma}{5}, \frac{n}{11} \right\}$ . For convenience, we will also make two additional assumptions.

**Assumption 6.** *In addition to the assumptions detailed in Assumption 5, assume the following conditions hold.*

1.  $\Gamma = [2m]$ .
2. For all  $i, l \in [2n]$  such that  $i \neq l$  then  $|\langle \mathbf{n}_i, \mathbf{n}_l \rangle| \leq \frac{\rho}{1-\gamma}$ .

As shown in the following lemma, these two additional conditions hold with high probability over the randomness of the initialization and training set.

**Lemma F.1.** *The extra conditions of Assumption 6 hold with probability at least  $1 - \delta$*

670 *Proof.* Recall the additional conditions of Assumption 6 over Assumption 5 are as follows,

- 671 1.  $\Gamma = [2m]$ ,
- 672 2. for all  $i, l \in [2n], i \neq l, |\langle \mathbf{n}_i, \mathbf{n}_l \rangle| \leq \frac{\rho}{1-\gamma}$ .

673 Using Lemma B.3, then for sufficiently large  $n$  there exists a constant  $c$  such that the probability the  
 674 first condition does not hold is at most  $m \exp(-cn)$ . Alternatively, setting  $\delta \geq 2m \exp(-cn)$  and  
 675 rearranging, as long as  $m \geq C \ln\left(\frac{2n}{\delta}\right)$  then the probability the first condition does not hold is at most  
 676  $\delta/2$ .

677 Using Lemma B.1, observing  $\frac{\rho}{1-\gamma} > \rho$  and under the conditions of the lemma that  $3\rho^{-2} \ln(4n^2) >$   
 678  $6$ , then as long as

$$d \geq 3\rho^{-2} \ln\left(\frac{4n^2}{\delta}\right)$$

679 the probability that the second condition does not hold is also at most  $\delta/2$ . Using the union bound we  
 680 therefore conclude that both properties hold with probability at least  $\delta$ .  $\square$

### 681 F.1 Proof of Lemma 3.9

682 **Lemma F.2** (Lemma 3.9). *Suppose Assumption 6 holds. Consider an arbitrary  $j \in [2m]$  and*  
 683 *iteration  $t$  satisfying  $2 \leq t < T_0$ . Then  $i \in \mathcal{A}_j^{(t)}$  iff  $i \sim j$ .*

684 *Proof.* First we establish at iteration  $t = 1$  that for all  $i \in \mathcal{S}_T, i \in \mathcal{A}_j^{(1)}$  iff  $i \sim j$ . The argument  
 685 here is similar to that of Lemma D.3. Suppose  $i \sim j$  and  $i \in \mathcal{S}_T$ . Recall from definition of  $\Gamma_p$  that  
 686  $G_j^{(i)}(0, 1)(\gamma - \rho) - B_j^{(i)}(0, 1)(\gamma + \rho) \geq \frac{2\lambda_w}{\eta}$ . By Assumption 6, all neurons are in  $\Gamma$ . Using Lemma  
 687 C.2

$$\begin{aligned} \langle \mathbf{w}_j^{(1)}, \mathbf{x}_i \rangle &\geq \langle \mathbf{w}_j^{(0)}, \mathbf{x}_i \rangle + \eta \left( T_{ij}(0, 1) + G_j^{(i)}(0, 1)(\gamma - \rho) - B_j^{(i)}(0, 1)(\gamma + \rho) \right) \\ &> \langle \mathbf{w}_j^{(0)}, \mathbf{x}_i \rangle + \eta (G_j(0, 1)(\gamma - \rho) - B_j(0, 1)(\gamma + \rho)) \\ &\geq \langle \mathbf{w}_j^{(0)}, \mathbf{x}_i \rangle + 2\lambda_w \\ &> \lambda_w. \end{aligned}$$

688 On the other hand, if  $i \not\sim j$  then again from Lemma C.2

$$\begin{aligned} \langle \mathbf{w}_j^{(1)}, \mathbf{x}_i \rangle &\leq \langle \mathbf{w}_j^{(0)}, \mathbf{x}_i \rangle - \eta \left( T_{ij}(0, 1) + G_j^{(i)}(0, 1)(\gamma - \rho) - B_j^{(i)}(0, 1)(\gamma + \rho) \right) \\ &\leq \langle \mathbf{w}_j^{(0)}, \mathbf{x}_i \rangle - \eta (G_j(0, 1)(\gamma - \rho) - B_j(0, 1)(\gamma + \rho)) \\ &\leq -\lambda_w. \end{aligned}$$

689 Now we consider  $t = 2$ . If  $i \in \mathcal{S}_T$  and  $i \sim j$  then

$$\begin{aligned} \langle \mathbf{w}_j^{(2)}, \mathbf{x}_i \rangle &\geq \langle \mathbf{w}_j^{(1)}, \mathbf{x}_i \rangle + \eta \left( T_{ij}(1, 2) + G_j^{(i)}(1, 2)(\gamma - \rho) - B_j^{(i)}(1, 2)(\gamma + \rho) \right) \\ &> \eta (1 + (n - k - 1)(\gamma - \rho) - 2k(\gamma + \rho)) \end{aligned}$$

690 whereas if  $i \in \mathcal{S}_T$  and  $i \not\sim j$  then

$$\begin{aligned} \langle \mathbf{w}_j^{(2)}, \mathbf{x}_i \rangle &\leq \langle \mathbf{w}_j^{(1)}, \mathbf{x}_i \rangle - \eta \left( T_{ij}(1, 2) + G_j^{(i)}(1, 2)(\gamma - \rho) - B_j^{(i)}(1, 2)(\gamma + \rho) \right) \\ &\leq -\eta((n - k)(\gamma - \rho) - 2k(\gamma + \rho)). \end{aligned}$$

691 By assumption  $\gamma > \frac{2+(n+k)\rho}{n-3k} > \frac{(n+k)\rho}{n-3k}$  and therefore for  $i \in \mathcal{S}_T$  then  $i \in \mathcal{A}_j^{(2)}$  iff  $i \sim j$ . Again  
 692 using Lemma C.2, for  $i \in \mathcal{S}_F$  and  $i \sim j$

$$\begin{aligned} \langle \mathbf{w}_j^{(1)}, \mathbf{x}_i \rangle &\geq \langle \mathbf{w}_j^{(0)}, \mathbf{x}_i \rangle - \eta \left( T_{ij}(0, 1) - G_j^{(i)}(0, 1)(\gamma - \rho) + B_j^{(i)}(0, 1)(\gamma + \rho) \right) \\ &> -\lambda_w - \eta \left( 1 - \frac{2\lambda_w}{\eta} \right) \\ &> -\eta, \end{aligned}$$

693 and for  $i \in \mathcal{S}_F$  and  $i \not\sim j$

$$\begin{aligned}\langle \mathbf{w}_j^{(1)}, \mathbf{x}_i \rangle &\leq \langle \mathbf{w}_j^{(0)}, \mathbf{x}_i \rangle + \eta \left( T_{ij}(0, 1) - G_j^{(i)}(0, 1)(\gamma - \rho) + B_j^{(i)}(0, 1)(\gamma + \rho) \right) \\ &< \lambda_w + \eta \left( 1 - \frac{2\lambda_w}{\eta} \right) \\ &< \eta.\end{aligned}$$

694 Therefore, as  $\gamma > \frac{2+(n+k)\rho}{n-3k}$  then for  $i \in \mathcal{S}_F$  and  $i \sim j$

$$\begin{aligned}\langle \mathbf{w}_j^{(2)}, \mathbf{x}_i \rangle &\geq \langle \mathbf{w}_j^{(1)}, \mathbf{x}_i \rangle - \eta \left( T_{ij}(1, 2) - G_j^{(i)}(1, 2)(\gamma - \rho) + B_j^{(i)}(1, 2)(\gamma + \rho) \right) \\ &> -\eta + \eta((n-k)(\gamma - \rho) - 2k(\gamma + \rho) - 1) \\ &> 0\end{aligned}$$

695 and for  $i \in \mathcal{S}_F$  and  $i \not\sim j$

$$\begin{aligned}\langle \mathbf{w}_j^{(2)}, \mathbf{x}_i \rangle &\leq \langle \mathbf{w}_j^{(1)}, \mathbf{x}_i \rangle + \eta \left( T_{ij}(1, 2) - G_j^{(i)}(1, 2)(\gamma - \rho) + B_j^{(i)}(1, 2)(\gamma + \rho) \right) \\ &< \eta - \eta((n-k)(\gamma - \rho) - 2k(\gamma + \rho) - 1) \\ &< 0.\end{aligned}$$

696 With the base case established we proceed by induction to prove if  $i \in \mathcal{A}_j^{(t-1)}$  iff  $i \sim j$  then  $i \in \mathcal{A}_j^{(t)}$   
697 iff  $i \sim j$ . By the assumptions on  $\gamma$ , the induction hypothesis and again using Lemma C.2, then for  
698  $i \sim j$

$$\begin{aligned}\langle \mathbf{w}_j^{(t)}, \mathbf{x}_i \rangle &\geq \langle \mathbf{w}_j^{(t-1)}, \mathbf{x}_i \rangle - \eta \left( T_{ij}(t-1, t) - G_j^{(i)}(t-1, t)(\gamma - \rho) + B_j^{(i)}(t-1, t)(\gamma + \rho) \right) \\ &> \eta((n-k)(\gamma - \rho) - k(\gamma + \rho) - 1) \\ &> 0\end{aligned}$$

699 and for  $i \not\sim j$

$$\begin{aligned}\langle \mathbf{w}_j^{(t)}, \mathbf{x}_i \rangle &\leq \langle \mathbf{w}_j^{(t-1)}, \mathbf{x}_i \rangle + \eta \left( T_{ij}(t-1, t) - G_j^{(i)}(t-1, t)(\gamma - \rho) + B_j^{(i)}(t-1, t)(\gamma + \rho) \right) \\ &< -\eta((n-k)(\gamma - \rho) - k(\gamma + \rho) - 1) \\ &< 0.\end{aligned}$$

700 Therefore for an epoch  $t$  satisfying  $2 \leq t \leq \mathcal{T}_1$   $i \in \mathcal{A}_j^{(t-1)}$  iff  $i \sim j$ . □

## 701 **F.2 Proof of Lemma 3.10**

702 **Lemma F.3** (Lemma 3.10). *Assume Assumption 6. Then there is an epoch  $\mathcal{T}_1 < \mathcal{T}_0$  such that*

$$\begin{aligned}\langle \mathbf{w}_j^{(\mathcal{T}_1)}, \mathbf{x}_i \rangle &\leq \frac{\gamma(n-2k) + \rho n - 1 + (\gamma - \rho)}{m(1 + \gamma(n-2k) + \rho n - (\gamma - \rho))} + O(\eta) \text{ if } i \in \mathcal{S}_F, i \sim j \\ \langle \mathbf{w}_j^{(\mathcal{T}_1)}, \mathbf{x}_i \rangle &\geq \frac{1 + \gamma(n-2k) - \rho n - (\gamma - \rho)}{m(1 + \gamma(n-2k) + \rho n - (\gamma - \rho))} + O(\eta) \text{ if } i \in \mathcal{S}_T, i \sim j \\ \langle \mathbf{w}_j^{(\mathcal{T}_1)}, \mathbf{x}_i \rangle &\leq -\frac{\gamma(n-2k) - \rho n}{m(1 + \gamma(n-2k) + \rho n - (\gamma - \rho))} + O(\eta) \text{ if } i \not\sim j\end{aligned}$$

703 and for  $i \in \mathcal{S}_T$

$$\ell(\mathcal{T}_1, \mathbf{x}_i) \leq \frac{2\rho n}{1 + \gamma(n-2k) + \rho n - (\gamma - \rho)} + O(\eta).$$

704 Furthermore,

$$\mathcal{T}_1 = \frac{1}{\eta m(1 + \gamma(n-2k) + \rho n - (\gamma - \rho))} + O(1).$$

705 *Proof.* Let  $t < \mathcal{T}_0$ . By Lemma F.2 and Lemma C.2 we can bound, for  $i \in \mathcal{S}_F$  and  $i \sim j$ ,

$$\begin{aligned}\langle \mathbf{w}_j^{(t)}, \mathbf{x}_i \rangle &\leq \langle \mathbf{w}_j^{(2)}, \mathbf{x}_i \rangle - \eta T_{ij}(2, t) - \eta(\gamma - \rho)B_j^{(i)}(2, t) + \eta(\gamma + \rho)G_j(2, t) \\ &= \eta t((\gamma + \rho)(n - k) - (\gamma - \rho)(k - 1) - 1) + O(\eta) \\ &= \eta t(\gamma(n - 2k) + \rho n - 1 + (\gamma - \rho)) + O(\eta).\end{aligned}$$

706 Similarly, for  $i \in \mathcal{S}_F$ ,  $i \not\sim j$ ,

$$\begin{aligned}\langle \mathbf{w}_j^{(t)}, \mathbf{x}_i \rangle &\leq \langle \mathbf{w}_j^{(2)}, \mathbf{x}_i \rangle + \eta T_{ij}(2, t) + \eta(\gamma + \rho)B_j^{(i)}(2, t) - \eta(\gamma - \rho)G_j(2, t) \\ &= -\eta t((\gamma - \rho)(n - k) - (\gamma + \rho)k) + O(\eta) \\ &= -\eta t(\gamma(n - 2k) - \rho n) + O(\eta).\end{aligned}$$

707 For  $i \in \mathcal{S}_T$ ,  $i \sim j$ ,

$$\begin{aligned}\langle \mathbf{w}_j^{(t)}, \mathbf{x}_i \rangle &\leq \langle \mathbf{w}_j^{(2)}, \mathbf{x}_i \rangle + \eta T_{ij}(2, t) + \eta(\gamma + \rho)G_j^{(i)}(2, t) - \eta(\gamma - \rho)G_j(2, t) \\ &= \eta t(1 + (\gamma + \rho)(n - k - 1) - (\gamma - \rho)k) + O(\eta) \\ &= \eta t(1 + \gamma(n - 2k) + \rho n - (\gamma + \rho)) + O(\eta)\end{aligned}$$

708 and

$$\begin{aligned}\langle \mathbf{w}_j^{(t)}, \mathbf{x}_i \rangle &\geq \langle \mathbf{w}_j^{(2)}, \mathbf{x}_i \rangle + \eta T_{ij}(2, t) + \eta(\gamma - \rho)G_j^{(i)}(2, t) - \eta(\gamma + \rho)G_j(2, t) \\ &= \eta t(1 + (\gamma - \rho)(n - k - 1) - (\gamma + \rho)k) + O(\eta) \\ &= \eta t(1 + \gamma(n - 2k) - \rho n - (\gamma - \rho)) + O(\eta).\end{aligned}$$

709 Lastly, for  $i \in \mathcal{S}_T$ ,  $i \not\sim j$ ,

$$\begin{aligned}\langle \mathbf{w}_j^{(t)}, \mathbf{x}_i \rangle &\leq \langle \mathbf{w}_j^{(2)}, \mathbf{x}_i \rangle + \eta T_{ij}(2, t) - \eta(\gamma - \rho)G_j^{(i)}(2, t) + \eta(\gamma + \rho)G_j(2, t) \\ &= -\eta t((\gamma - \rho)(n - k) - (\gamma + \rho)k) + O(\eta) \\ &= -\eta t(\gamma(n - 2k) - \rho n) + O(\eta)\end{aligned}$$

710 Therefore, for  $i \in \mathcal{S}_T$ ,

$$\begin{aligned}f(t, \mathbf{x}_i) &= y_i \sum_{j=1}^{2m} (-1)^j \phi(\langle \mathbf{w}_j^{(t)}, \mathbf{x}_i \rangle) \\ &= \sum_{j \sim i} \langle \mathbf{w}_j^{(t)}, \mathbf{x}_i \rangle\end{aligned}$$

711 from which we conclude

$$\eta m t(1 + \gamma(n - 2k) - \rho n - (\gamma - \rho)) + O(\eta) \leq f(t, \mathbf{x}_i) \leq \eta m t(1 + \gamma(n - 2k) + \rho n - (\gamma - \rho)) + O(\eta).$$

712 Therefore, as long as

$$\eta m t(1 + \gamma(n - 2k) + \rho n - (\gamma - \rho)) + O(\eta) < 1, \quad (9)$$

713 then  $\ell(t, \mathbf{x}_i) > 0$ . Let  $\mathcal{T}_1$  be the largest value of  $t$  satisfying (9) and  $t < \mathcal{T}_0$ . We see that

$$\mathcal{T}_1 = \frac{1}{\eta m(1 + \gamma(n - 2k) + \rho n - (\gamma - \rho))} + O(1).$$

714 From this, the desired bounds follow. □

### 715 F.3 Proof of Lemma 3.11

716 **Lemma F.4** (Lemma 3.11). *Let Assumption 6 hold. Suppose there is a time  $t_0$  so that:*

717 a.  $\ell(t_0, \mathbf{x}_i) \leq a$  for all  $i \in \mathcal{S}_T$ ,

718 b.  $\phi(\langle \mathbf{w}_j^{(t_0)}, \mathbf{x}_i \rangle) \leq b$  for all  $i \in \mathcal{S}_F$  and  $i \sim j$ ,

719 c. For all iterations  $\tau$  satisfying  $t_0 \leq \tau \leq t$  it holds that  $i \in \mathcal{A}_j^{(\tau)}$  only if  $i \sim j$ ,

720 *d. For all iterations  $\tau$  satisfying  $t_0 \leq \tau \leq t$ ,  $i \in \mathcal{A}_j^{(\tau)}$  if  $i \sim j$  and  $i \in \mathcal{S}_T$ .*

721 *We can bound*

$$B_j(t_0, \tau) \leq k \left( \frac{3b}{2\eta} + \frac{2a}{\eta m} \right)$$

$$\sum_{j \sim s} G_j(t_0, t) \leq \frac{1}{\gamma} \left( \frac{3a}{2\eta} + \frac{mb}{\eta} \right).$$

722 *Proof.* Fix a neuron  $j$ . Using Lemma C.3 and assumption (b) we bound for  $t < \tau \leq t$ ,  $i \in \mathcal{S}_F$ , and  
 723  $i \sim j$

$$\phi(\langle \mathbf{w}_j^{(\tau-1)}, \mathbf{x}_i \rangle) \leq b - \eta(T_{ij}(t_0, \tau - 1) - (\gamma + \rho)G_j(t_0, \tau - 1) - 1).$$

724 There are two possibilities. If this bound is negative, then  $T_{ij}(t_0, \tau) = T_{ij}(t_0, \tau - 1)$ . Otherwise,

$$\begin{aligned} T_{ij}(t_0, \tau) &\leq T_{ij}(t_0, \tau - 1) + 1 \\ &\leq \frac{b}{\eta} + (\gamma + \rho)G_j(t_0, \tau - 1) + 2 \\ &\leq \frac{b}{\eta} + (\gamma + \rho)G_j(t_0, \tau) + 2 \end{aligned}$$

725 This yields, by induction,

$$T_{ij}(t_0, \tau) \leq \frac{b}{\eta} + (\gamma + \rho)G_j(t_0, \tau) + 2.$$

726 We then sum over all  $i \in \mathcal{S}_F$  such that  $i \sim j$ . By assumption (c),

$$\sum_{\substack{i \in \mathcal{S}_F \\ i \sim j}} T_{ij}(t_0, \tau) = B_j(t_0, \tau).$$

727 This yields

$$B_j(t_0, \tau) \leq \frac{kb}{\eta} + k(\gamma + \rho)B_j(t_0, \tau) + 2k$$

728 which, by our assumption, is equivalent to

$$B_j(t_0, \tau) \leq \frac{kb}{\eta} + \frac{k(\gamma + \rho)}{m} \sum_{\ell \sim j} G_\ell(t_0, t) \quad (10)$$

729 since the number of clean updates on two neurons  $\ell$  and  $j$  with  $\ell \sim j$  is the same by assumption (c)  
 730 and (d).

731 Fix  $s \in [2m]$ . We now bound  $\sum_{j \sim s} G_j(t_0, t)$ . This time, we use Lemma C.2 to bound for  $i \in \mathcal{S}_T$   
 732 and  $i \sim j$

$$\langle \mathbf{w}_j^{(\tau-1)}, \mathbf{x}_i \rangle \geq \langle \mathbf{w}_j^{(t)}, \mathbf{x}_i \rangle + \eta(T_{ij}(t_0, \tau - 1) + (\gamma - \rho)G_j^{(i)}(t_0, \tau - 1) - (\gamma + \rho)B_j(t_0, \tau - 1)).$$

733 Using assumption (c) and (d),

$$\begin{aligned} y_i f(\tau - 1, \mathbf{x}_i) &= \sum_{j \sim i} \phi(\langle \mathbf{w}_j^{(\tau-1)}, \mathbf{x}_i \rangle) \\ &\geq \sum_{j \sim i} \left( \langle \mathbf{w}_j^{(t_0)}, \mathbf{x}_i \rangle + \eta T_{ij}(t_0, \tau - 1) \right. \\ &\quad \left. + \eta(\gamma - \rho)G_j^{(i)}(t_0, \tau - 1) - \eta(\gamma + \rho)B_j(t_0, \tau - 1) \right) \\ &\geq (1 - a) + \eta(1 - (\gamma - \rho))T_i(t_0, \tau - 1) \\ &\quad + \left( \sum_{j \sim i} ((\gamma - \rho)G_j(t_0, \tau - 1) - (\gamma + \rho)B_j(t_0, \tau - 1)) \right). \end{aligned}$$

734 Either  $T_i(t_0, \tau) = T_i(t_0, \tau - 1)$  or  $\ell(\tau, \mathbf{x}_i) > 0$ . If the latter holds, then

$$\eta((1 - (\gamma - \rho))T_i(t_0, \tau - 1) + \sum_{j \sim i} ((\gamma - \rho)G_j(t_0, \tau - 1) - (\gamma + \rho)B_j(t_0, \tau - 1))) < a.$$

735 Suppose  $\tau' \leq \tau$  is the first iteration before  $\tau$  such that  $G_j(\tau', \tau) = 0$ . Let  $i \in \mathcal{S}_T$ ,  $i \sim s$  be a point  
736 that makes an update at iteration  $\tau' - 1$ . Using the above bound, we see

$$\eta((1 - (\gamma - \rho))T_i(t_0, \tau' - 1) + \sum_{j \sim i} ((\gamma - \rho)G_j(t_0, \tau' - 1) - (\gamma + \rho)B_j(t_0, \tau' - 1))) < a.$$

737 which implies

$$\sum_{j \sim i} ((\gamma - \rho)G_j(t_0, \tau' - 1) - (\gamma + \rho)B_j(t_0, \tau' - 1)) < \frac{a}{\eta}$$

738 and

$$\sum_{j \sim s} ((\gamma - \rho)G_j(t_0, \tau') - (\gamma + \rho)B_j(t_0, \tau')) < \frac{a}{\eta} - 2(n - k)(\gamma - \rho).$$

739 By definition of  $\tau'$ , we conclude

$$\sum_{j \sim s} ((\gamma - \rho)G_j(t_0, \tau) - (\gamma + \rho)B_j(t_0, \tau)) < \frac{a}{\eta} - 2(n - k)(\gamma - \rho).$$

740 From this we get the bound

$$\sum_{j \sim s} G_j(t_0, t) \leq \frac{1}{\gamma - \rho} \left( \frac{a}{\eta} + (\gamma + \rho) \sum_{j \sim s} B_j(t_0, t) \right) + O(1). \quad (11)$$

741 We combine (10) with (11) summed over  $j \sim s$  to see

$$\begin{aligned} \sum_{j \sim s} G_j(t_0, t) &\leq \frac{1}{\gamma - \rho} \left( \frac{a}{\eta} + (\gamma + \rho) \left( \frac{kmb}{\eta} + k(\gamma + \rho) \sum_{j \sim s} G_j(t_0, t) \right) \right) + O(1) \\ &\leq \frac{1}{\gamma - \rho - k(\gamma + \rho)^2} \left( \frac{a}{\eta} + \frac{kmb(\gamma + \rho)}{\eta} \right) + O(1) \end{aligned}$$

742 and

$$B_j(t_0, \tau) \leq \frac{kb}{\eta} + \frac{k(\gamma + \rho)}{m(\gamma - \rho - k(\gamma + \rho)^2)} \left( \frac{a}{\eta} + \frac{kmb(\gamma + \rho)}{\eta} \right) + O(1).$$

743 Using  $\rho \leq \frac{\gamma}{5}$ ,  $\eta$  sufficiently small, and  $\gamma \leq \frac{1}{36k}$  (Assumption 6) these bounds simplify to

$$\begin{aligned} B_j(t_0, \tau) &\leq k \left( \frac{3b}{2\eta} + \frac{2a}{\eta m} \right) \\ \sum_{j \sim s} G_j(t_0, t) &\leq \frac{1}{\gamma} \left( \frac{3a}{2\eta} + \frac{mb}{\eta} \right). \end{aligned} \quad \square$$

#### 744 **F.4 Late training**

745 **Lemma F.5.** *Under Assumption 6, the training process terminates at an iteration  $\mathcal{T}_{end}$  satisfying*

$$\ell(\mathcal{T}_{end}, \mathbf{x}_i) = 0$$

746 for all  $i \in \mathcal{S}_T$  and

$$\phi(\langle \mathbf{w}_j^{(\mathcal{T}_{end})}, \mathbf{x}_i \rangle) = 0$$

747 for all  $i \in \mathcal{S}_F$  and  $j \in [2m]$ .

748 *Proof.* By Lemma F.3 and Lemma F.4, we converge provided that the assumptions of the lemmas are  
 749 satisfied. Since Lemma F.3 requires only Assumption 6, we turn our attention towards Lemma F.4.  
 750 This has more delicate conditions. Let  $t_0 = \mathcal{T}_1$ . We first see that the conditions on  $a$  and  $b$  are  
 751 satisfied if we take

$$a = \frac{2\rho n}{1 + \gamma(n - 2k) + \rho n - (\gamma - \rho)} + O(\eta)$$

$$b = \frac{\gamma(n - 2k) + \rho n - 1 + (\gamma - \rho)}{m(1 + \gamma(n - 2k) + \rho n - (\gamma - \rho))} + O(\eta).$$

752 using Lemma F.3. Next, using Lemma C.2 we see by induction on  $t \geq \mathcal{T}_1$  that if

$$B_j(\mathcal{T}_1, t) < \frac{\gamma(n - 2k) - \rho n}{\eta m(\gamma + \rho)(1 + \gamma(n - 2k) + \rho n - (\gamma - \rho))} + O(1)$$

753 then for  $i \not\sim j$  and  $\mathcal{T}_1 \leq \tau \leq t$ ,

$$\begin{aligned} \langle \mathbf{w}_j^{(\tau)}, \mathbf{x}_i \rangle &\leq \langle \mathbf{w}_j^{(\mathcal{T}_1)}, \mathbf{x}_i \rangle + \eta(\gamma + \rho)B_j(\mathcal{T}_1, \tau) \\ &\leq \langle \mathbf{w}_j^{(\mathcal{T}_1)}, \mathbf{x}_i \rangle + \eta(\gamma + \rho)B_j(\mathcal{T}_1, t) \\ &< 0 \end{aligned}$$

754 and for  $i \in \mathcal{S}_T$ ,  $i \sim j$ , and  $\mathcal{T}_1 \leq \tau \leq t$ ,

$$\begin{aligned} \langle \mathbf{w}_j^{(\tau)}, \mathbf{x}_i \rangle &\geq \langle \mathbf{w}_j^{(\mathcal{T}_1)}, \mathbf{x}_i \rangle - \eta(\gamma + \rho)B_j(\mathcal{T}_1, \tau) \\ &\geq \langle \mathbf{w}_j^{(\mathcal{T}_1)}, \mathbf{x}_i \rangle - \eta(\gamma + \rho)B_j(\mathcal{T}_1, t) \\ &\geq \frac{1 - (\gamma - \rho)}{m(1 + \gamma(n - 2k) + \rho n - (\gamma - \rho))} + O(\eta) \\ &> 0 \end{aligned}$$

755 for  $\eta$  sufficiently small. So we converge to the desired steady state so long as

$$k \left( \frac{3b}{2\eta} + \frac{2a}{\eta m} \right) < \frac{\gamma(n - 2k) - \rho n}{\eta m(\gamma + \rho)(1 + \gamma(n - 2k) + \rho n - (\gamma - \rho))} + O(1)$$

756 which is equivalent to

$$k(\gamma + \rho) \left( \frac{3}{2} (\gamma(n - 2k) - 1 + (\gamma - \rho)) + \frac{11}{2} \rho n \right) < \gamma(n - 2k) - \rho n + O(\eta).$$

757 This is true by Assumption 6, as

$$\begin{aligned} k(\gamma + \rho) \left( \frac{3}{2} (\gamma(n - 2k) - 1 + (\gamma - \rho)) + \frac{11}{2} \rho n \right) &\leq \frac{1}{30} \left( \frac{3}{2} \gamma(n - 2k) - \frac{3}{2} + \frac{1}{36} + \frac{1}{2} \right) \\ &\leq \frac{1}{20} \gamma(n - 2k) - \frac{1}{2} \\ &< \gamma(n - 2k) - \rho n \end{aligned}$$

758 using  $\gamma \leq \min \left\{ \frac{1}{36k}, \frac{1}{36} \right\}$  and  $\rho \leq \min \left\{ \frac{7}{5}, \frac{n}{11} \right\}$ . □

759 **Lemma F.6.** Assume Assumption 6 holds. Let  $y \in \{-1, 1\}$  chosen uniformly and  $\mathbf{x} :=$   
 760  $(y\sqrt{\gamma}\mathbf{v}, \sqrt{1 - \gamma}\mathbf{n})$ , where  $\mathbf{n} \sim \text{Uniform}(\mathcal{S}^{d-1} \cap \text{span}\{\mathbf{v}\}^\perp)$ . Suppose that  $|\langle \mathbf{n}, \mathbf{n}_\ell \rangle| < \frac{\rho}{1 - \gamma}$  for  
 761 all  $\ell \in [2n]$ , then  $yf(\mathcal{T}_{\text{end}}, \mathbf{x}) > 0$ .

762 *Proof.* We proceed similarly to Lemma D.13.

763 Following the same steps as in (5) for any  $j \in [2m]$

$$\begin{aligned} \langle \mathbf{w}_j^{(\mathcal{T}_{\text{end}})}, \mathbf{x} \rangle &= \langle \mathbf{w}_j^{(2)}, \mathbf{x}_i \rangle + (-1)^j \eta \sum_{\ell=1}^{2n} T_{\ell j}(1, \mathcal{T}_{\text{end}}) y_\ell \langle \mathbf{x}_\ell, \mathbf{x}_i \rangle \\ &= \langle \mathbf{w}_j^{(2)}, \mathbf{x}_i \rangle + (-1)^j y \eta \sum_{\ell=1}^{2n} T_{\ell j}(2, t) (-1)^\ell y \beta(\ell) \langle \mathbf{x}_\ell, \mathbf{x} \rangle \\ &= \langle \mathbf{w}_j^{(2)}, \mathbf{x}_i \rangle + (-1)^j y \eta \sum_{\ell=1}^{2n} T_{\ell j}(2, t) \lambda'_{i\ell}, \end{aligned}$$

764 where  $\lambda'_\ell := (-1)^l y \beta(\ell) \langle \mathbf{x}_\ell, \mathbf{x} \rangle = \beta(\ell) \gamma + (1 - \gamma) \langle \mathbf{n}_\ell, \mathbf{n} \rangle$ . Then as in Lemma C.1

$$\begin{aligned} \gamma - \rho &\leq \lambda'_\ell \leq \gamma + \rho, \text{ if } i \in \mathcal{S}_T, \\ -(\gamma + \rho) &\leq \lambda'_\ell \leq -(\gamma - \rho), \text{ if } i \in \mathcal{S}_F. \end{aligned}$$

765 Recall, from Lemma F.2 for any  $j \in [2m]$  then  $G_j(2, \mathcal{T}_{\text{end}}) \geq G_j(2, \mathcal{T}_1) = (\mathcal{T}_1 - 2)(n - k)$ . As a  
766 consequence, for  $j \in \Gamma_p$  we have

$$\begin{aligned} \langle \mathbf{w}_j^{(\mathcal{T}_{\text{end}})}, \mathbf{x} \rangle &\geq \langle \mathbf{w}_j^{(2)}, \mathbf{x}_i \rangle + \eta G_j(2, \mathcal{T}_{\text{end}})(\gamma - \rho) - \eta B_j(2, \mathcal{T}_{\text{end}})(\gamma + \rho) \\ &\geq O(\eta) + \mathcal{T}_1(n - k)(\gamma - \rho) - \eta B_j(2, \mathcal{T}_{\text{end}})(\gamma + \rho). \end{aligned}$$

767 For  $j$  such that  $(-1)^j = y$  then

$$\begin{aligned} \phi(\langle \mathbf{w}_j^{(\mathcal{T}_{\text{end}})}, \mathbf{x} \rangle) &\leq \phi(\langle \mathbf{w}_j^{(2)}, \mathbf{x}_i \rangle - \eta G_j(2, \mathcal{T}_{\text{end}})(\gamma - \rho) + \eta B_j(2, \mathcal{T}_{\text{end}})(\gamma + \rho)) \\ &\leq O(\eta) + \eta B_j(2, \mathcal{T}_{\text{end}})(\gamma + \rho). \end{aligned}$$

768 As a result

$$\begin{aligned} yf(\mathcal{T}_{\text{end}}, \mathbf{x}) &= \sum_{j \in [2m]} \phi(\langle \mathbf{w}_j^{(\mathcal{T}_{\text{end}})}, \mathbf{x} \rangle) \\ &\geq \sum_{j : (-1)^j = y} \langle \mathbf{w}_j^{(\mathcal{T}_{\text{end}})}, \mathbf{x} \rangle - \sum_{j : (-1)^j \neq y} \phi(\langle \mathbf{w}_j^{(\mathcal{T}_{\text{end}})}, \mathbf{x} \rangle) \\ &\geq \eta \sum_{j : (-1)^j = y} (\mathcal{T}_1 - 2)(n - k)(\gamma - \rho) - \eta \sum_{j \in [2n]} B_j(2, \mathcal{T}_{\text{end}})(\gamma + \rho) + O(\eta) \\ &\geq \eta m \mathcal{T}_1(n - k)(\gamma - \rho) - \eta B(2, \mathcal{T}_{\text{end}})(\gamma + \rho) + O(\eta) \end{aligned}$$

769 We decompose  $B(2, \mathcal{T}_{\text{end}}) = B(2, \mathcal{T}_1) + B(\mathcal{T}_1, \mathcal{T}_{\text{end}})$ . From Lemma F.2,

$$B(2, \mathcal{T}_1) = 2km(\mathcal{T}_1 - 2) = 2km\mathcal{T}_1 + O(1).$$

770 From Lemma F.3 and Lemma F.4, using the assumptions  $\rho \leq \frac{n}{11}$ ,  $\eta$  sufficiently small, and  $\gamma \leq$   
771  $\min\{\frac{k}{36}, \frac{1}{36}\}$ ,

$$\begin{aligned} B(\mathcal{T}_1, \mathcal{T}_{\text{end}}) &\leq 2mk \left( \frac{3b}{2\eta} + \frac{2a}{\eta m} \right) \\ &\leq 2mk\mathcal{T}_1 \left( \frac{3(\gamma(n - 2k) + \rho n - 1 + (\gamma - \rho))}{2} + 4\rho n \right) + O(1) \\ &\leq 2m\mathcal{T}_1 \left( \frac{n - 2k}{24} + \frac{1}{22} - \frac{1}{2} + \frac{1}{72} + \frac{4}{11} \right) + O(1) \\ &\leq \frac{m\mathcal{T}_1(n - k)}{12}. \end{aligned}$$

772 Using the assumption that  $k \leq \frac{n}{100}$  and  $\eta$  is sufficiently small we see that

$$B(2, \mathcal{T}_{\text{end}}) \leq \frac{m\mathcal{T}_1(n - k)}{9}.$$

773 Since

$$yf(\mathcal{T}_{\text{end}}, \mathbf{x}) \geq \eta m \mathcal{T}_1(n - k)((\gamma - \rho) - (\gamma + \rho)/9) + O(\eta),$$

774  $yf(\mathcal{T}_{\text{end}}, \mathbf{x})$  is positive provided  $(\gamma - \rho) - (\gamma + \rho)/9$  is positive and  $\eta$  is sufficiently small. Both are  
775 guaranteed by Assumption 6, so the point is correctly classified.  $\square$

## 776 F.5 Proof of Theorem 3.8

777 **Theorem F.7** (Theorem 3.8). Assume Assumption 5 holds. With probability at least  $1 - \delta$  over the  
778 randomness of the dataset and network initialization we have the following.

779 1. The training process terminates at an iteration  $\mathcal{T}_{\text{end}} \leq \frac{Cn}{\eta}$ .

780 2. For all  $i \in \mathcal{S}_T$  then  $\ell(\mathcal{T}_{\text{end}}, \mathbf{x}_i) = 0$  while for all  $i \in \mathcal{S}_F$   $\ell(\mathcal{T}_{\text{end}}, \mathbf{x}_i) = 1$ .

781 3. The generalization error satisfies

$$\mathbb{P}(\text{sgn}(f(\mathcal{T}_{\text{end}}, \mathbf{x})) \neq y) \leq C \exp\left(-\frac{d}{2n^2}\right).$$

782 *Proof.* Under Assumption 6, statements (1) and (2) follow from Lemma F.5. The bound on  $\mathcal{T}_{\text{end}}$   
 783 follows from Lemma F.4 applied at  $t_0 = 2$ :

$$B(2, \mathcal{T}_{\text{end}}) \leq k \left( \frac{4}{\eta m} \right) + O(\eta)$$

$$B(2, \mathcal{T}_{\text{end}}) \leq \frac{2}{\gamma} \left( \frac{3}{2\eta} \right) + O(\eta)$$

784 with  $\gamma > \frac{3}{n}$ . Statement (3) is derived from Lemma F.6. Finally, Lemma F.1 implies that under  
 785 Assumption 5 then Assumption 6 holds with probability at least  $1 - \delta$ .  $\square$

## 786 G Numerical simulations

787 **Reproducibility statement:** the code used to generate the following figures can be found at [https://anonymous.4open.science/r/benign\\_overfitting-4A4C/B0\\_experiments.ipynb](https://anonymous.4open.science/r/benign_overfitting-4A4C/B0_experiments.ipynb).  
 788

789 To investigate our theory we train two-layer neural networks with ReLU activations using full-batch  
 790 gradient descent and a fixed step size. We train on the synthetic binary classification dataset, detailed  
 791 in Section B.2, that we have studied throughout the paper. Finally we train using both hinge and  
 792 logistic loss.

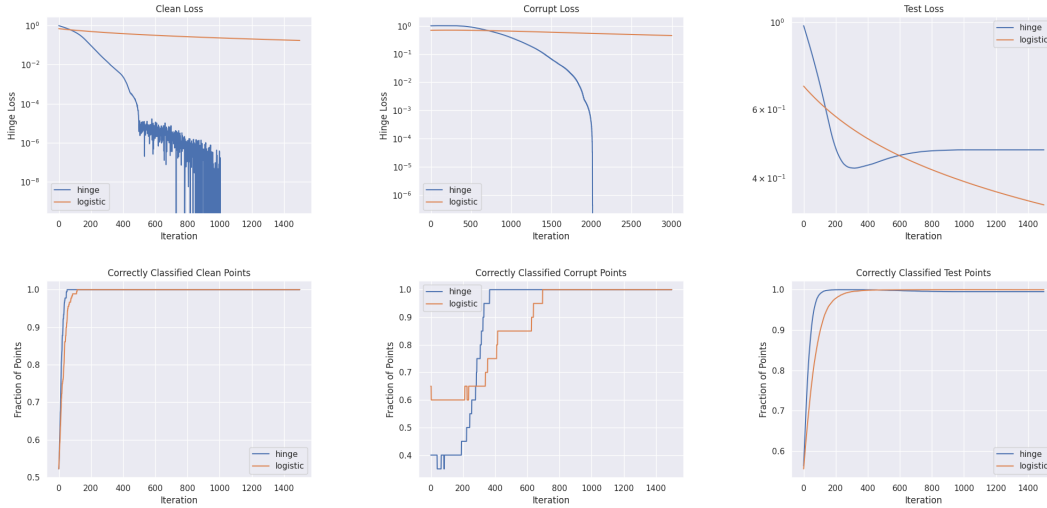

Figure 1: From left to right, the first row shows the clean, corrupt, and test losses as a function of epoch. The second row shows the fraction of clean, corrupt, and test points that are classified correctly. These plots were generated for  $n = 100$ ,  $d = 800$ ,  $k/n = 0.1$ ,  $m = 100$ ,  $\gamma = 0.015$ , and using gradient descent with a step size of 0.01.

793 In Figure 1 we call attention to the difference in the training dynamics of hinge loss versus logistic  
 794 loss. Perhaps the key difference between hinge loss and logistic loss is that the contributions from any  
 795 given point do not get smaller as the point approaches 0 loss. Furthermore, unlike with the logistic  
 796 loss points can actually attain zero hinge loss after a finite number of epochs. Once they do attain zero  
 797 loss, they cease to contribute to the update of the network parameters. If the remaining active points  
 798 push the parameters in such a way as to increase the loss on a given point then it will reactivate. As a  
 799 result points close to zero hinge loss periodically activate and deactivate giving rise to the chaotic

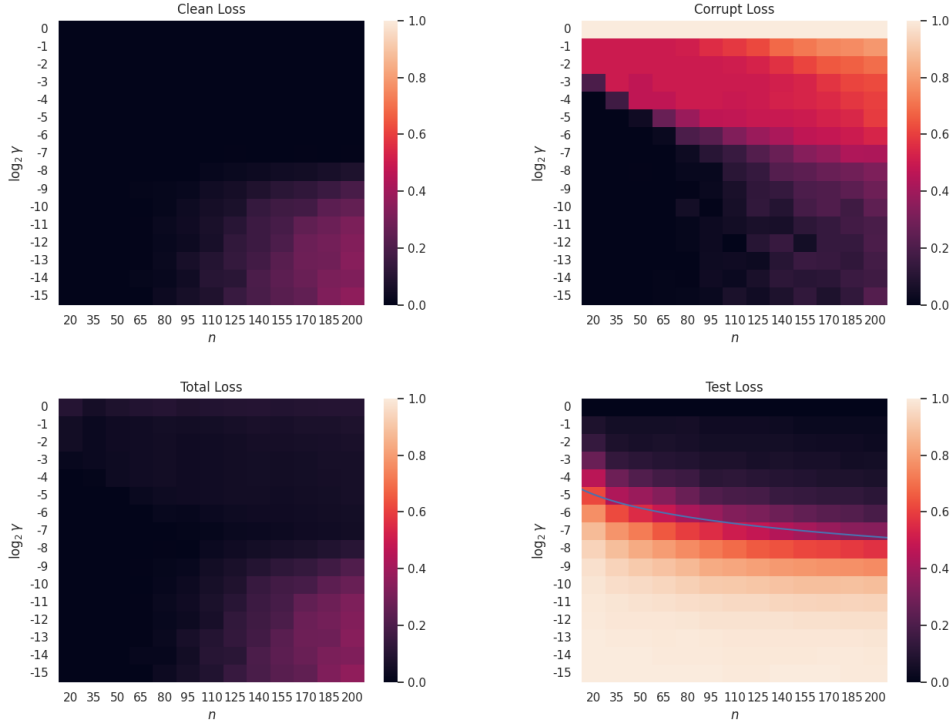

Figure 2: In the top row we show the loss on the clean training points and the corrupt training points after training. In the bottom row we show the total loss after training, along with the test loss on 10000 random generated points after training. For each plot we set  $d = 1000, m = 30, \eta = 0.005$  and train for 5000 iterations of gradient descent using hinge loss. In each plot we vary  $\gamma$  and  $n$  and hold the fraction of corrupt points constant at 0.05. In the bottom right plot we also graph  $c/n$  for  $c \approx 0.6$

800 behavior observed as the training loss approaches zero. We note that managing this behavior required  
801 a careful analysis that is distinct from the analysis for logistic loss.

802 In Figure 2 we call particular attention to the bottom right plot. Our theory predicts a phase transition  
803 between benign overfitting and non-benign overfitting when  $\gamma \approx c/n$ : the phase transition we observe  
804 empirically in the bottom-right heatmap suggests this estimate is reasonable. With regard to the hinge  
805 loss over the corrupt points, displayed in the top-right heatmap, we observe another phase transition,  
806 this time between overfitting and non-overfitting. The top and bottom heatmaps of the left-hand  
807 column display the hinge loss over the clean training set and total training set respectively, these  
808 appear very similar due to the fact that clean points make up 95% of the training set. The clean points  
809 fail to achieve zero, or close to zero, hinge loss only when  $\gamma$  is small and  $n$  is large. As stated in the  
810 caption, in these experiments  $d$  is fixed and thus as  $n$  increases the near-orthogonality condition we  
811 require on the noise components in order to prove convergence to zero clean loss is compromised. As  
812 a result, when  $\gamma$  is small and the correlations between noise vectors is potentially large it is possible  
813 for pairs of points with opposite labels to be significantly correlated.

814 **References**

- 815 Keith Ball. An elementary introduction to modern convex geometry. 1997.
- 816 Rémi Bardenet and Odalric-Ambrym Maillard. Concentration inequalities for sampling without  
817 replacement. 2015.
- 818 Spencer Frei, Niladri S Chatterji, and Peter Bartlett. Benign overfitting without linearity: Neural  
819 network classifiers trained by gradient descent for noisy linear data. In *Conference on Learning*  
820 *Theory*, pp. 2668–2703. PMLR, 2022.
- 821 Xingyu Xu and Yuantao Gu. Benign overfitting of non-smooth neural networks beyond lazy training.  
822 In Francisco Ruiz, Jennifer Dy, and Jan-Willem van de Meent (eds.), *Proceedings of The 26th*  
823 *International Conference on Artificial Intelligence and Statistics*, volume 206 of *Proceedings*  
824 *of Machine Learning Research*, pp. 11094–11117. PMLR, 25–27 Apr 2023. URL [https://](https://proceedings.mlr.press/v206/xu23k.html)  
825 [proceedings.mlr.press/v206/xu23k.html](https://proceedings.mlr.press/v206/xu23k.html).
